# 1 Odor motion sensing enables complex plume navigation

2  
3 Nirag Kadakia<sup>1,2,3</sup>, Mahmut Demir<sup>1</sup>, Brenden T. Michaelis<sup>4</sup>, Matthew A. Reidenbach<sup>4</sup>, Damon A. Clark<sup>1,2,5,6\*</sup>,  
4 and Thierry Emonet<sup>1,2,5,6\*</sup>

5  
6 <sup>1</sup>Department of Molecular, Cellular, and Developmental Biology, Yale University, New Haven, CT, USA

7 <sup>2</sup>Quantitative Biology Institute, Yale University, New Haven, CT, USA

8 <sup>3</sup>Swartz Foundation for Theoretical Neuroscience, Yale University, New Haven, CT, USA

9 <sup>4</sup>Department of Environmental Sciences, University of Virginia, Charlottesville, VA, USA

10 <sup>5</sup>Interdepartmental Neuroscience Program, Yale University, New Haven, CT, USA

11 <sup>6</sup>Department of Physics, Yale University, New Haven, CT, USA

12  
13 \*Correspondence: [thierry.emonet@yale.edu](mailto:thierry.emonet@yale.edu) and [damon.clark@yale.edu](mailto:damon.clark@yale.edu)  
14

## 15 ABSTRACT

16 Studies dating back a century (Flügge, 1934) have stressed the critical role of the wind as the  
17 primary directional cue in odor plume navigation. Here, we show that *Drosophila* shape their  
18 navigational decisions using a second directional cue – *the direction of motion of odors* – which  
19 they detect from the temporal correlations of the odor signal between their two antennae. Using  
20 a high-resolution virtual reality paradigm to deliver spatiotemporally complex fictive odors to  
21 freely-walking flies, we demonstrate that such odor direction sensing is computationally equivalent  
22 to motion detection algorithms underlying motion detection in vision. Simulations and theoretical  
23 analysis of turbulent plumes reveal that odor motion contains valuable directional information  
24 absent from the airflow; indeed, this information is used by both *Drosophila* and virtual agents to  
25 navigate naturalistic odor environments. The generality of our findings suggests that odor  
26 direction sensing is likely used throughout the animal kingdom, and could significantly improve  
27 olfactory robot navigation in harsh chemical environments.

## 28 29 INTRODUCTION

30 Odor plumes in the wild are spatially complex and rapidly fluctuating structures carried by  
31 turbulent airflows (Riffell et al., 2008). Odors arrive in bursts of high concentration interrupted by  
32 periods of undetectable signal (Murlis et al., 1992; Murlis et al., 2000), and the temporal statistics  
33 of these odor encounters can vary by orders of magnitude (Celani et al., 2014). To successfully  
34 navigate odor plumes in search of food and mates, insects must extract and integrate multiple  
35 features of the odor signal, including the odor encounters' intensity (Alvarez-Salvado et al., 2018;  
36 Pang et al., 2018), spatial distribution (Jung et al., 2015; Tao et al., 2020), and temporal aspects  
37 such as timing (Mafra-Neto and Cardé, 1994; van Breugel and Dickinson, 2014), duration  
38 (Alvarez-Salvado et al., 2018), and frequency (Demir et al., 2020; Jayaram et al., 2021; Kanzaki  
39 et al., 1992; Mafra-Neto and Cardé, 1994; Vickers and Baker, 1994). Effective plume navigation  
40 requires balancing these multiple streams of olfactory information and integrating them with other  
41 sensory inputs including visual and mechanosensory cues (Budick et al., 2007; Suver et al., 2019;  
42 van Breugel and Dickinson, 2014).

43 Like many animals, insects sense odors using two spatially separated sensors – their antennae  
44 – which provides an information stream whose role in navigation still remains unclear. Indeed,  
45 *Drosophila* can detect inter-antennal concentration differences, and use them to navigate simple  
46 plumes such as static ribbons, where gradients are resolvable and informative (Duistermars et  
47 al., 2009; Gaudry et al., 2013). But the relevance of bilateral sensing for natural plume navigation  
48 is less clear, since odor gradients in turbulent flows fluctuate rapidly and do not reliably point

49 toward the source (Alvarez-Salvado et al., 2018). Assessing whether insects use these gradients  
50 in complex plumes would require imaging odor signals in real-time during navigation, which was  
51 done for the first time only recently (Demir et al., 2020). While theoretical studies have suggested  
52 that gradients may be informative in near-surface turbulent plumes (Boie et al., 2018), this is not  
53 yet supported by observations (Alvarez-Salvado et al., 2018).

54 Here, we reveal a distinct role for bilateral sensing: detecting the direction of motion of odor  
55 signals. A waft of odor, such as a thin odor filament, passing laterally over an insect hits the two  
56 antennae sequentially; the filament's direction of motion could in principle be inferred by resolving  
57 differences in firing rate between the antennae over time. Indeed, by reanalyzing data from an  
58 experiment in which odor plumes were measured simultaneously with fly behavior (Demir et al.,  
59 2020), we find a significant correlation between fly turning and odor motion direction. To  
60 investigate causality, we develop an optogenetic approach to deliver fictive odor signals with high  
61 temporal and spatial precision, and completely divorced from wind, to freely-walking *Drosophila*.  
62 In this setup, flies reliably turn against the direction of fictive odors, even in the absence of wind  
63 – fly turning responses are odor *direction selective*. Leveraging stimuli from experiments exploring  
64 direction selectivity in the fly eye (Salazar-Gatzimas et al., 2016), we find that odor direction  
65 selectivity is consistent with elementary correlation-based algorithms underlying visual motion  
66 detection (Hassenstein and Reichardt, 1956), revealing the generality of these computations  
67 across sensory modalities. Naively, since odors are transported by the wind, odor motion and  
68 wind motion could be considered redundant directional cues. Instead, we find that odor direction  
69 sensing integrates with wind-driven responses in a mostly additive manner, and we show, using  
70 simulations of complex plumes, that odor motion contains valuable directional information absent  
71 in the airflow. To demonstrate the utility of odor direction sensing in a goal-directed task, we  
72 delivered complex fictive odor plumes and assessed flies' ability to localize the source. Selectively  
73 perturbing odor direction, while leaving all other aspects of the plume and airflow unaltered,  
74 significantly degrades flies' navigational performance. Finally, we show that complex plume  
75 navigation by virtual agents *in silico* is significantly enhanced by odor direction sensing,  
76 suggesting improvements in the design of olfactory robots. Our work reveals a key information  
77 stream for natural plume navigation, and suggests a valuable role for spatiotemporal sensing in  
78 environments which lack reliable odor gradients.

79

## 80 **RESULTS**

### 81 **Flies respond direction selectively to odor motion in the absence of wind**

82 To investigate if flies sense and react to odor direction, we first re-analyzed a dataset of walking  
83 *Drosophila* navigating a complex, visualizable odor plume whose odor statistics resemble those  
84 in turbulent flows (Demir et al., 2020) (Fig. 1a). In this plume, gradients can be randomly oriented  
85 relative to the source, and often differ substantially from the odor direction (Fig. 1a; green and  
86 magenta vectors). Since the odor is visible, we can quantify the odor signal perceived during  
87 navigation, as well as infer the projections along the antennae of the odor gradient and of the odor  
88 motion direction (Fig. 1b and Supplementary Fig. 1), while simultaneously measuring fly behavior  
89 (Fig. 1b). Insects turn upwind when encountering odor signals (Alvarez-Salvado et al., 2018;  
90 Budick and Dickinson, 2006; Demir et al., 2020; van Breugel and Dickinson, 2014), which we  
91 verified for flies oriented slightly away from the upwind direction (blue and red curves in Fig. 1c).  
92 For flies already oriented upwind, there was no odor-elicited turning bias, nor any turning bias  
93 relative to the perceived odor gradient (Fig. 1d). However, in this case, fly turning correlated  
94 significantly with odor *direction* (Fig. 1e), suggesting that flies use directional odor cues when  
95 directional information from the wind is minimized.

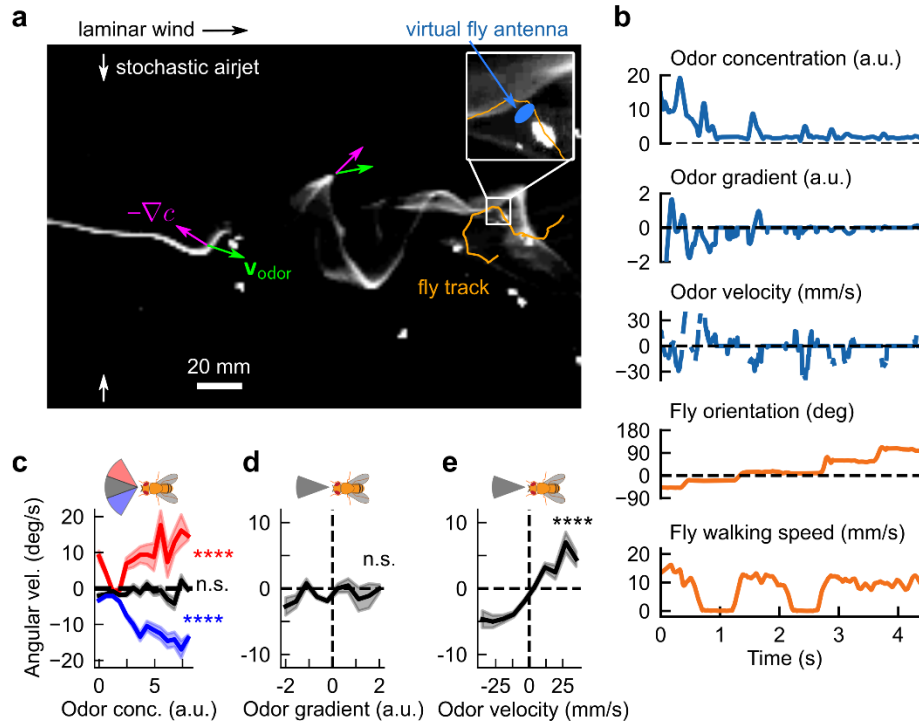

**Figure 1. *Drosophila* turning behaviors are correlated with odor direction in a spatiotemporally complex odor plume.** **a**, Snapshot of walking flies navigating a spatiotemporally complex odor plume generated by stochastically perturbing an odor ribbon in laminar flow with lateral airjets. Odor gradients (magenta arrows) and odor direction (green arrows) do not necessarily align, and can point in random directions relative to the odor source. Blue oval: virtual fly antennae region used to estimate perceived signal quantities during navigation. **b**, Example time trace of perceived signal-derived quantities (blue) and fly behaviors (orange) for track shown in **a**. Odor direction was computed by cross-correlating the signal in the virtual antenna over successive frames, and determining the spatial shift giving maximal correlation, while odor gradient was computed by linearly regressing the odor concentration against position along the major axis of the virtual antenna. **c**, Fly angular velocity as a function of odor concentration, for flies oriented in a 40° upwind sector (black), or in a 40° sector centered 20° clockwise (red) or counterclockwise (blue) from the upwind direction. Positive values indicate a counterclockwise turn. Correlations are significant for flies in the off-axis sectors (slopes =  $0.037 \pm 0.005$ ,  $n = 174$  tracks and  $-0.039 \pm 0.003$ ,  $n = 312$  tracks for clockwise and counterclockwise sectors, respectively.  $p < 1e-6$  (two-tailed t-test) for both sectors), but not those oriented directly upwind (slope =  $0.005 \pm 0.003$ ,  $p > 0.05$ ,  $n = 285$  tracks). **d-e**, Fly angular velocity versus odor gradient and odor direction for flies oriented in a 40° sector upwind. Angular velocity is uncorrelated with odor gradient (mean slope =  $-0.005 \pm 0.003$ ,  $p > 0.05$ , two-tailed t-test,  $n = 284$  tracks) but significantly correlated with odor direction (mean slope =  $0.040 \pm 0.003$ ,  $p < 1e-6$ , two-tailed t-test,  $n = 282$  tracks) in the virtual antenna.

96 Still, since odors are transported by the airflow, odor direction and wind motion are inherently  
 97 correlated. To break this correlation, we turned to optogenetic stimulation of olfactory receptor  
 98 neurons (ORNs) using the red-shifted channelrhodopsin Chrimson (Bell and Wilson, 2016;  
 99 Klapoetke et al., 2014; Mafra-Neto and Cardé, 1994; Tao et al., 2020). We reasoned that not only  
 100 would optogenetics allow us to adjust the airflow independently of the odor signal, it would also  
 101 give us tight ( $< 300 \mu\text{m}$ ) and fast ( $< 16 \text{ms}$ ) control of the stimulus. We combined two experimental  
 102 paradigms into a single optogenetic setup. The first is a large arena, high-throughput wind tunnel  
 103 for walking fruit flies, also used to collect the data in Fig. 1 (Demir et al., 2020). The second is a  
 104 method for patterned optogenetic stimulation using a light projector mounted above the arena  
 105 (DeAngelis et al., 2020) (Fig. 2a). Our setup can deliver spatially complex light patterns throughout  
 106 the arena, and individual flies can be optogenetically stimulated with sub-mm resolution. Due to

107 Chrimson's high sensitivity (Klapoetke et al., 2014), the relatively low light intensity of the projector  
108 ( $4.25 \mu\text{W}/\text{mm}^2$ ) over the large  $27 \times 17 \text{ cm}^2$  arena was sufficient to stimulate a sustained firing  
109 response in ORNs, as verified with electrophysiology (Supplementary Fig. 2a). As a proof-of-  
110 concept, we projected fictive "odor ribbons" onto the arena while flowing laminar wind  
111 (Supplementary Fig. 2b), and recorded flies in which the olfactory co-receptor *Orco* drove the  
112 expression of Chrimson. Though flies are only weakly responsive to red light, we used blind flies  
113 throughout to remove any visual effects. Previous studies have shown that optogenetic  
114 stimulation of *Orco*-expressing neurons acts as an attractive fictive odor signal (Bell and Wilson,  
115 2016; Tao et al., 2020). Indeed, flies turned and followed the fictive ribbons upwind, mirroring fly  
116 responses to streaming ribbons of attractive odors such as ethyl acetate and apple cider vinegar  
117 (Demir et al., 2020) (Supplementary Fig. 2b). By aligning the coordinate systems of the camera  
118 and projector, we can track flies' behaviors simultaneously with their perceived fictive odor signal,  
119 giving us spatiotemporally precise measurements of fictive odor stimuli (Methods, Supplementary  
120 Fig. 2c).

121 Next, we presented a simple stimulus consisting of traveling fictive odors bars in the absence of  
122 wind. Flies oriented perpendicular to the bar motion receive differential stimulation across their  
123 antennae when the edges of each bar pass across them. If flies responded selectively to the  
124 direction of fictive odor motion, we would expect opposing behaviors for bars traveling rightward  
125 versus leftward. We thus presented 5mm-wide bars traveling 15 mm/s either left or right, in 5s-  
126 long blocks followed by a 5s-long block of no stimulus (Fig. 2b). Right-moving bars elicited a net  
127 displacement of fly position to the left, and vice versa (Fig. 2c). Further, flies oriented against the  
128 direction of motion during the 5s stimulus block, but exhibited no asymmetry during the 5s blank  
129 (Fig. 2d). Notably, both of these behaviors were absent in *Orco*>Chrimson flies with one antenna  
130 ablated (Supplementary Fig. 3a-b), but were preserved when Chrimson was expressed only in  
131 ORNs expressing the receptor *Or42b* (Supplementary Fig. 3c-d), which is known to drive olfactory  
132 attraction to vinegar (Semmelhack and Wang, 2009). These experiments suggested that flies'  
133 olfactory responses were direction selective, and that direction selectivity is enabled by bilateral  
134 sensing from the two antennae. The key indicator of direction selectivity was counterturning  
135 against bar motion – a reasonable response for locating an odor source emitting propagating odor  
136 signals.

### 137 **Direction selective responses to ON and OFF edges are computed with a timescale of tens** 138 **of milliseconds**

139 Since insects and vertebrates both detect spatial gradients of odor concentration and use them  
140 to navigate (Catania, 2013; Duistermars et al., 2009; Gardiner and Atema, 2010; Rajan et al.,  
141 2006; Wu et al., 2020), we wondered if gradient sensing could explain the directional biases we  
142 observed. We repeated the experiments above with wider (30-45 mm) bars, which allowed us to  
143 quantify responses to each edge individually – the ON edge, when the fictive odor first passes  
144 over the fly, and the OFF edge, when fictive odor leaves the fly (Fig. 2e). Responses to these  
145 stimuli would clearly distinguish direction selectivity from gradient sensing, since gradient sensing  
146 would result in opposing behaviors at the ON and OFF edges while direction sensing responses  
147 would be the same (Fig. 2e). We calculated fly turning bias, defined as the sign of the cumulative  
148 change in orientation between 150 and 300 ms after the edge hit, as a function of the fly's  
149 orientation relative to the moving edge. For both ON and OFF edges, these plots had strong  
150 positive peaks for fly's oriented parallel to the edge, indicating that flies are responding to the odor  
151 direction, not the spatial gradient (Fig. 2f). Meanwhile, the responses were flat for control flies

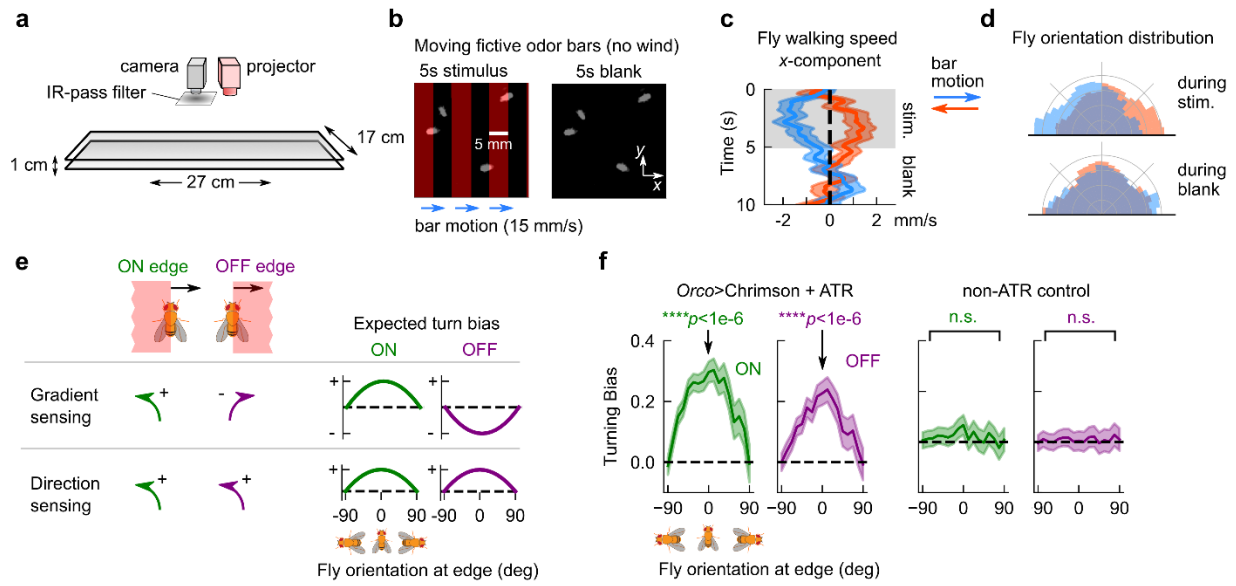

152

**Figure 2. Turning responses are consistent with direction sensing, not gradient sensing.** **a**, Schematic of fly walking assay. Flies with Chrimson expressed in ORNs receive optogenetic stimulation from a video projector mounted above arena, which displays fictive odor stimuli throughout arena with high spatial (< 300  $\mu\text{m}$ ) and temporal (< 6 ms) precision. **b**, Fictive odor bars moving at 15 mm/s are presented in 5s blocks, interleaved with a 5s blank period. Differences in fly orientation or velocity for rightward (along +x) versus leftward (along -x) bar motion would indicate that flies can sense odor direction without mechanical cues from the wind. **c**, Component of fly walking velocity along +x direction during the 5s stimulus (shaded grey) and blank periods, for rightward (blue;  $n = 407$  tracks) and leftward (orange,  $n = 455$  tracks) moving bars, for *Orco>Chrimson* flies. Shaded error bars: SEM. **d**, Distribution of fly orientations during the 5s stimulus period (top) and 5s blank period (bottom), for rightward (blue) and leftward (orange) bar motion. Orientations are symmetrized over the x-axis. The differential effects in **c** and **d** disappeared for the same genotype with 1 antenna ablated (Supplementary Fig. 3a-b), but were maintained for flies with Chrimson expressed only in ORNs that express *Or42b* (Supplementary Fig. 3c-d). **e**, Direction sensing can be differentiated from gradient sensing by measuring turning responses as a function of fly orientation at both edges of wide, moving fictive odor bars: the ON edge (when the fictive odor passes onto the fly) and the OFF edge (when it leaves it). **f**, Fly turning bias versus orientation at ON (green) and OFF (purple) edge, for *Orco>Chrimson* flies that are optogenetically active (left 2 plots) and optogenetically inactive (i.e. not fed ATR; right 2 plots). Bars move at either 10 or 15 mm/s (data is pooled); turning bias is quantified as the sign of the change in orientation over the window from 150 ms to 300 ms after the bar onset, where +1 is counterclockwise and -1 is clockwise. Each point covers a span of  $\pm 45^\circ$ ; thus, distinct points contain overlapping data. Error bars: SEM. Turning bias for optogenetically active flies oriented perpendicular to the bar motion ( $\theta = 0$ ) are significantly distinct from zero for both ON and OFF edges ( $p < 1e-6$  for both edges, chi-squared test;  $n = 2398$  tracks), but not for optogenetically inactive flies ( $p > 0.05$  for both edges;  $n = 3622$  tracks).

153 (Fig. 2f). Repeating this for various bar speeds  $|v_{\text{bar}}|$  showed strong direction selectivity for bars  
 154 at 10 and 15 mm/s, and a suppression for lower speeds down to 1 mm/s (Supplementary Fig. 4).  
 155 For slower speeds — 1 and 5 mm/s — the ON response was still significant, while the OFF  
 156 response was absent, which could result from gradient sensing in nearly static odor environments.  
 157 Finally, directional turning responses were essentially absent in two negative controls – flies in  
 158 which Chrimson is not activated, or those with 1 antenna ablated (Supplementary Fig. 4).

### 159 Turning responses to odor motion and wind motion are summed.

160 Insects universally bias their heading upwind in the presence of odor (Alvarez-Salvado et al.,  
 161 2018; Baker et al., 2018; Budick and Dickinson, 2006; Demir et al., 2020; Kanzaki et al., 1992;  
 162 Kennedy and Marsh, 1974; Mafra-Neto and Cardé, 1994; Vickers and Baker, 1994), but the role

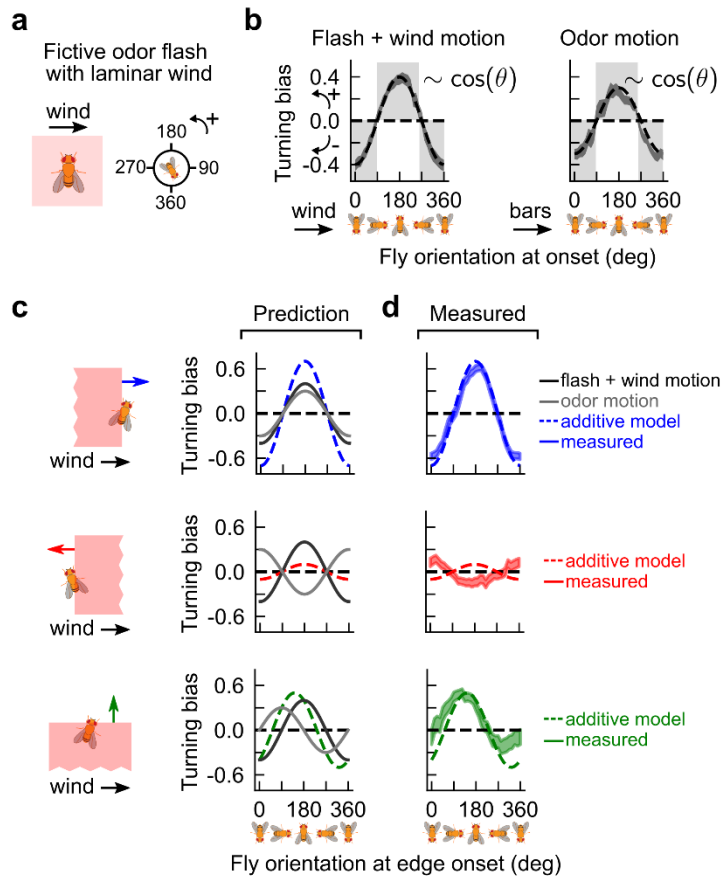

**Figure 3. Turning responses to odor motion and wind motion are summed.** **a**, Flashing the whole arena stimulates both antennae simultaneously, thus removing bilateral information that could enable direction selectivity. Laminar wind is introduced at 150 mm/s. **b**, Fly turning bias as a function of fly orientation, defined as in Fig. 2, for fictive bilateral odor flashes in the presence of wind (left) and moving fictive odor bars without wind (right). The latter plot is the same data as in Fig. 2f. Axes for the two plots are defined such that  $90^\circ$  points in the direction of the wind or the direction of the bars, respectively. Grey shades: values for which fly turns counter to the wind direction or bar direction; all measured values lie in this range. Both plots can be well approximated by  $-0.4\cos\theta$  and  $-0.3\cos\theta$ , respectively. **c**, By row: expected turning bias versus orientation (dashed curve) for bars oriented parallel, antiparallel, or perpendicular to the wind, assuming that turning bias is the sum of the fitted cosines from **b**, which are reproduced in black and grey, respectively. Note that in the 2<sup>nd</sup> and 3<sup>rd</sup> row, the grey curve has a phase shift depending on the bar direction relative to the wind. **d**, Solid curves: measured data. Bars move at 15 mm/s. Dashed curves: expected responses from **c**. Shaded regions: 1 standard error.  $n = 2586, 2535, 2467, 1614$  tracks for flash, and bars parallel, antiparallel, and perpendicular to the wind, respectively. Responses to OFF edges were very weak, suggesting other nonlinear interactions between the loss of odor and the wind (Supplementary Fig. 5).

163 of odor direction in this upwind response is unknown. Our patterned optogenetic setup allowed  
 164 us to investigate this by independently controlling the wind and odor direction, which is otherwise  
 165 impossible in natural environments. Above, we quantified turning bias in response to odor motion,  
 166 but without wind (Fig. 2). We reasoned that in the presence of both wind and odor motion, fly  
 167 responses would reflect some sort of summation of these responses in isolation, so we now  
 168 presented fictive odors in wind, but without the motion of odor. To remove odor motion, we flowed  
 169 laminar wind and flashed the entire arena for 2.5 seconds, followed by 2.5 seconds of no stimulus  
 170 (Fig. 3a). This stimulates both antennae simultaneously, removing bilateral information — an  
 171 artificial stimulus that is difficult to deliver with natural odors. In this situation, flies bias their

172 heading upwind (against the wind) at the onset of the flash (Fig. 3b; left plot), reminiscent of their  
173 tendency to turn “against” the odor motion in the absence of wind (Fig. 2f). The similarity of turning  
174 responses to wind and odor motion separately is illustrated by fitting the turning bias versus  
175 orientation plots to a sinusoid (Fig. 3b; dashed lines). In both cases, the plots are well fit by  $A\cos\theta$ ,  
176 where  $A_{\text{wind}} = -0.40$  and  $A_{\text{odor}} = -0.30$ .

177 These simple functional forms encouraged us to consider a simple hypothesis for how flies  
178 respond to fictive odor edges moving at a given angle relative to the wind. We hypothesized that  
179 the response to the combined signal is a sum of the bar motion and odor motion responses. This  
180 hypothesis predicts that when the odor and wind direction are aligned, the peak response should  
181 increase in magnitude and remain centered at  $0^\circ$  and  $180^\circ$  (Fig. 3c; first row). If odor and wind  
182 motion oppose each other, these peaks should nearly cancel (Fig. 3c; middle row). Finally, in the  
183 interesting case of wind and odor directions perpendicular to each other, the peaks should shift  
184 leftward to  $\sim 145^\circ$  and  $\sim 325^\circ$  (Fig. 3c; bottom row). To test these predictions, we presented fictive  
185 odor bars either parallel, antiparallel, or perpendicular to 150 mm/s laminar wind. When the wind  
186 and odor were aligned, the turning bias at ON edges was nearly perfectly fit by the additive  
187 prediction (Fig. 3d). The antiparallel motion of bars and odors was also fit well – extrema remained  
188 at  $0^\circ$  and  $180^\circ$ , though the cancellation overshot slightly. Notably, the response to perpendicularly  
189 oriented wind and odor reproduced the shift of the response curve peak from  $\sim 180^\circ$  to  $145^\circ$ , and  
190 nearly reproduced the shift of the minimum from  $\sim 360^\circ$  to  $\sim 325^\circ$ . These results suggest that odor  
191 direction selective responses integrate with directional information from the wind in a largely, but  
192 not entirely, additive fashion. Moreover, universally observed upwind turning responses are more  
193 than naive mechanosensory reactions triggered by the presence of odor – they can be enhanced  
194 and even cancelled by directional information from the odor itself.

### 195 **Flies use spatiotemporal correlations in odor intensity to detect odor direction.**

196 We next tested the extent to which our observations were consistent with elementary motion  
197 detection algorithms, by first analyzing our data for moving bars in the absence of wind (Fig. 2).  
198 Odor motion creates a difference in latency  $\Delta T$  between the stimulation of the two spatially  
199 separated antennae, the sign and magnitude of which determines the output of direction-selective  
200 models such as the classical Hassenstein-Reichardt correlator (HRC) (Hassenstein and  
201 Reichardt, 1956). In our assay,  $\Delta T$  can be inferred from the velocity of the bars relative to the flies  
202 using simple geometric considerations (Supplementary Fig. 6; Methods). This allows us to  
203 express turning bias as a function of  $\Delta T$ , thereby directly testing the predictions of an HRC model.  
204 In a rightward-selective HRC (Fig. 4a), a signal from the left antenna is multiplied with the delayed  
205 signal from the right antenna, where the delay is implemented as an exponential filter  $e^{-t/\tau}$ .  
206 Subtracting this from a similar computation with the antennae switched gives the detector output  
207  $r(t)$ . We modeled the turning bias as the time integral of  $r(t)$ , for which the HRC predicts a turning  
208 bias proportional to  $1 - e^{-\Delta T/\tau}$  for rightward moving edges. Thus, plotting the turning bias against  
209  $\Delta T$  would allow us to extract the filter time constant  $\tau$ , revealing the timescale of olfactory motion  
210 detection. Pooling the data from both ON and OFF edges, we found that the prediction was fit  
211 well, with filter timescales in the range  $\tau = 25 \pm 12$  ms (Fig. 4b). Though this estimate is  
212 approximate and limited by the temporal and spatial resolution of the projector, it is notable that  
213 the timescale is comparable to the timescales of visual motion detection in *Drosophila* vision  
214 (Salazar-Gatzimas et al., 2016).

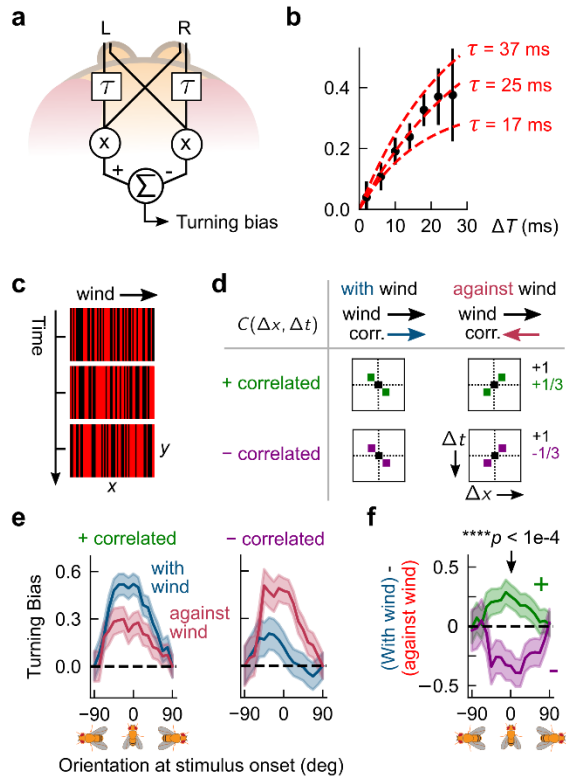

**Figure 4. Olfactory direction sensing obeys a correlation-based algorithm.** **a**, Schematic of hypothesized Hassenstein-Reichardt correlator (HRC) model in the olfactory circuit. Signal from one antenna projects to both brain hemispheres, but with distinct temporal transformations; we implement this by filtering one arm with  $e^{-t/\tau}$ . Fly's turning bias is modeled as the time integral of the correlator output (Methods). **b**, Black dots: measured turning bias versus  $\Delta T$ , for all times fly crosses a fictive odor edge. Each datapoint spans  $\pm 4$  ms. The HRC model predicts that turning bias is proportional to  $1 - e^{-\frac{\Delta T}{\tau}}$ , which can be used to extract the delay timescale  $\tau$ . Middle red line: fit of HRC to mean of turning bias; upper/lower lines: fit to mean  $\pm 1$  SEM of the turning bias. Estimated correlator timescale  $\tau$  lies in a range of tens of milliseconds. **c**, Correlated noise stimuli consist of 1-pixel-wide fictive odor bars perpendicular to 150 mm/s laminar flow. In one frame, each bar is independently bright or dark with equal probability (3 subsequent frames are shown). However, stimuli are correlated in time, so the bar pattern in the next frame depends on the pattern in the current frame. In this illustration, bars are positively correlated along  $+x$ , so a bright bar at a given  $x$  in one frame is likely to be preceded by a bright bar one  $x$ -pixel to its right in the next frame. Visually, this would look like a rightward moving pattern. **d**, There are 4 types of stimuli, depending on the correlation direction (along  $+x$ , i.e. with-wind, or along  $-x$ , i.e. against the wind) and the correlation parity (+ or -). Each type of stimulus is characterized by the correlation matrix  $C(\Delta x, \Delta t)$  between two bars separated spatiotemporally by  $\Delta x$  pixels and  $\Delta t$  frames. Since our stimuli are generated by summing and binarizing Gaussian variables, nonzero correlations are not absolute, but rather have magnitude  $1/3$ . For example, for positively correlated with-wind stimuli (top left plot),  $C(1, 1) = C(-1, -1) = 1/3$ , and the remaining correlations are zero, while for negatively correlated with-wind stimuli (bottom left plot),  $C(1, 1) = C(-1, -1) = -1/3$ . **e**, Turning bias versus fly orientation for positively correlated (left) and negatively correlated (right) stimuli. Stimuli are presented in 4s blocks, interleaved with 4s of no stimulus; wind flows throughout. Turning biases are defined as the sign of the change in orientation over 300 ms from the onset of the 4s stimulus block.  $n = 489, 496$  for positively correlated with and against-wind, and  $338, 335$  for negatively correlated wind and against-wind, respectively. **f**, Difference  $D$  between with-wind and against-wind responses from **c**, for positively (green) and negatively (purple) correlated stimuli. The value of  $D$  for positive and negative correlations differed significantly for flies oriented perpendicular to the bar motion ( $\theta = 0$ ), ( $p < 1e-4$ , chi-squared test).

215 Elementary motion detection algorithms respond fundamentally to correlations in the signal over  
 216 space and time. To better compare against the predictions of the HRC, we moved beyond ON  
 217 and OFF odor edges and turned to *correlated noise* stimuli, which have been used to characterize  
 218 direction selective computations in fly vision (Salazar-Gatzimas et al., 2016). A snapshot of a



219 correlated noise stimuli is a pattern of 1-pixel wide bars, each of which is either bright or dark (Fig.  
220 4c). The pattern updates in time in such a way that it contains well-defined positive or negative  
221 correlations between adjacent pixels. Intuitively, a positive correlation in the +x direction means  
222 that bright bar at a given x is likely to be preceded, in the subsequent frame, by a bright bar 1  
223 pixel to its right; visually, this would appear to be a rightward moving pattern. To enhance the  
224 effects, we simultaneously flowed laminar wind as in the experiments in Fig. 3. Thus, there were  
225 four types of correlated noise stimuli, corresponding to the possible combinations of correlation  
226 direction (with or against wind) and polarity (negative or positive), each of which is uniquely  
227 defined by its correlation matrix  $C(\Delta x, \Delta t)$  (Fig. 4d).

228 In this experiment, turning responses to positively-correlated noise stimuli mimicked those to  
229 moving bars: upwind turning was suppressed when the correlation direction opposed the wind  
230 (Fig. 4e; first plot). Importantly, spatial gradients in these stimuli quickly average to zero, so only  
231 a computation sensitive to spatiotemporal correlations — and not gradients — could account for  
232 behavioral suppression when the correlation direction and wind were misaligned. Repeating for  
233 negative correlations, we found that upwind turning was suppressed when the correlation and  
234 wind were *aligned* (Fig. 4e; second plot). Notably, this response is also consistent with a  
235 correlation-based algorithm, which predicts a reversal of behavior when the correlation polarity  
236 flips sign (Salazar-Gatzimas et al., 2016). In fact, this “*reverse phi*” phenomenon is actually an  
237 illusion – a byproduct of a pairwise correlator algorithm – that has been observed in visual  
238 responses of several species (Clark et al., 2011; Livingstone et al., 2001; Orger et al., 2000;  
239 Salazar-Gatzimas et al., 2018; Tuthill et al., 2011), including humans (Anstis and Rogers, 1975).  
240 Subtracting the with-wind and against-wind responses for each polarity indicated clearly that the  
241 reverse phi prediction was satisfied (Fig. 4f).

242 We corroborated our results using *gliders*, another class of correlated stimuli (Clark et al., 2014;  
243 Hu and Victor, 2010). Visually, a glider is a random pattern of light and dark bars moving in one  
244 direction (Supplementary Fig. 7a). Unlike correlated noise, the bars are correlated not only with  
245 a neighboring bar in the subsequent frame, but also with more distant bars at later times.  
246 However, unlike the weaker 1/3 correlations for correlated noise, the correlations in glider stimuli  
247 are perfect (Supplementary Fig. 7b), so we expected similar trends as before, but with larger  
248 effect sizes. For positively correlated gliders, we found similar trends as with correlated noise, but  
249 much larger separations between the with-wind and against-wind responses (Supplementary Fig.  
250 7c). We were also able to explore a range of correlation times by adjusting the frame update  
251 times. For update times in the range of 17-30 ms, we find direction selective responses, while for  
252 shorter update times (11 ms), direction selectivity disappeared (Supplementary Fig. 7d).  
253 Interestingly, the maximum separation of with-wind and against-wind responses was with a frame  
254 update of 17-22 ms, consistent with the estimate of the HRC filter constant using moving bars  
255 (Fig. 4b).

256 For flies to sense these correlations in our assay, their antennae must be optogenetically  
257 stimulated by distinct pixels. We satisfied this requirement by mounting the projector such that  
258 the x-pixel width (~290  $\mu\text{m}$ ) approximated the *D. melanogaster* antennal separation  
259 (Supplementary Fig. 7e) (Miller and Carlson, 2010). Consistent with this, effects must also reduce  
260 for bars that are wider than the antennal separation. Indeed, repeating the experiments with  
261 double the bar width, we found no significant differences between with-wind and against-wind  
262 responses (Supplementary Fig. 7f). Together, these results suggest that *Drosophila* olfactory  
263 direction sensing obeys a correlation-based algorithm.

## 264 Odor direction encodes crosswind position and aids navigation in complex plumes

265 Animals could use measurements of odor direction to help them navigate complex plumes,  
266 provided this information complements other directional cues such as gradients or wind. To  
267 quantify the distribution of odor signal directions in a naturalistic plume, we ran numerical  
268 simulations of an environment replicating the plume from Fig. 1. These simulations provide not  
269 only a more finely resolved concentration field, but also the airflow velocity field (Fig. 5a), which  
270 is experimentally inaccessible. We first compared, for a few fixed points in the plume, the odor  
271 velocity  $\mathbf{v}_{\text{odor}}$  and the airflow  $\mathbf{v}_{\text{wind}}$  at a single time. Both  $\mathbf{v}_{\text{odor}}$  and  $\mathbf{v}_{\text{wind}}$  had x-components  
272 comparable to the mean flow speed 150 mm/s. However,  $\mathbf{v}_{\text{odor}}$  also had large crosswind  
273 components  $\mathbf{v}_{y,\text{odor}}$  pointing outward from the plume centerline, which were noticeably absent  
274 from  $\mathbf{v}_{\text{wind}}$  (Fig. 5b; left). Averaging over all detectable odor filaments in the 120s simulation  
275 revealed a similar trend: away from the plume centerline, the distribution of  $\mathbf{v}_{\text{odor}}$  spanned a tight  
276 angular range, pointing consistently outward in the crosswind direction (Fig. 5b; middle column).  
277 Meanwhile,  $\mathbf{v}_{\text{wind}}$  was distributed largely downwind, with much smaller outward angles (Fig. 5b;  
278 right column). To visualize the “flow” of odor motion, we calculated the time-average of  $\langle \mathbf{v}_{\text{odor}} \rangle$  at  
279 all locations in the plume. We compared this to the time-average of the wind vector conditional on  
280 the presence of odor,  $\langle \mathbf{v}_{\text{wind}|\text{odor}} \rangle$ . We used the latter rather than the unconditional wind velocity,  
281  $\langle \mathbf{v}_{\text{wind}} \rangle$ , since for an ideal point source of odor within homogeneous turbulence, the latter does not  
282 encode the lateral location of the source. Throughout the plume,  $\langle \mathbf{v}_{\text{odor}} \rangle$  flowed strongly outward  
283 from the plume center, while  $\langle \mathbf{v}_{\text{wind}|\text{odor}} \rangle$  was directed essentially downwind (Fig. 5c).

284 This analysis suggests that in naturalistic odor plumes emanating from a point source, odor  
285 direction is a strong indicator of the direction towards the centerline of the plume. This directional  
286 cue is not necessarily reflected in the local wind, nor in the local gradients, though we did find that  
287 odor gradients have a similar crosswind structure closer to the source, where the plume is less  
288 intermittent (Supplementary Fig. 8a). Of course, to be useful for navigation, odor direction must  
289 be resolvable on realistic timescales. By calculating the running average of the odor direction at  
290 a fixed location, we found that in most of the plume extent, only several hundred milliseconds  
291 were necessary to resolve the lateral components (Supplementary Fig. 8b-c). Since odor bursts  
292 occurred at ~1-5 Hz in this particular plume, a navigator could estimate the direction of odor  
293 motion orthogonal to the mean flow after only a few odor hits.

294 To investigate how *Drosophila* use odor motion during a navigation task, we designed a fictive  
295 odor plume whose boundaries were subtended by a cone — as if emanating from a source —  
296 and within which thin bars moved laterally outward from or inward toward the centerline, while  
297 laminar wind flowed along the cone axis (Fig. 5d). We reasoned that inward moving bars, which  
298 are reversed from their natural flow, would degrade localization to the odor “source,” i.e. the tip of  
299 the cone. For both bar directions, flies stayed within the conical fictive odor region, but were  
300 significantly more likely to reach the upwind source region when the bars moved naturally outward  
301 (9.8% versus 4.8% reached the source for outward versus inward bars, respectively,  $p < 0.01$ ,  
302 two-tailed t-test) (Fig. 5e-f). Notably, the fictive odor signals in these two paradigms do not differ  
303 by location, frequency, duration, or spatial gradient — differences in performance (Fig. 5f) can  
304 only be explained by odor direction alone. We then tried the more realistic case of projecting a  
305 video of a recorded plume (Fig. 1a) onto the arena (Fig. 5b), playing the video not only normally,  
306 but also in reverse. As in the previous paradigm, reverse playback reverses odor direction without  
307 perturbing any other spatial or temporal information measured at each point. Remarkably, the

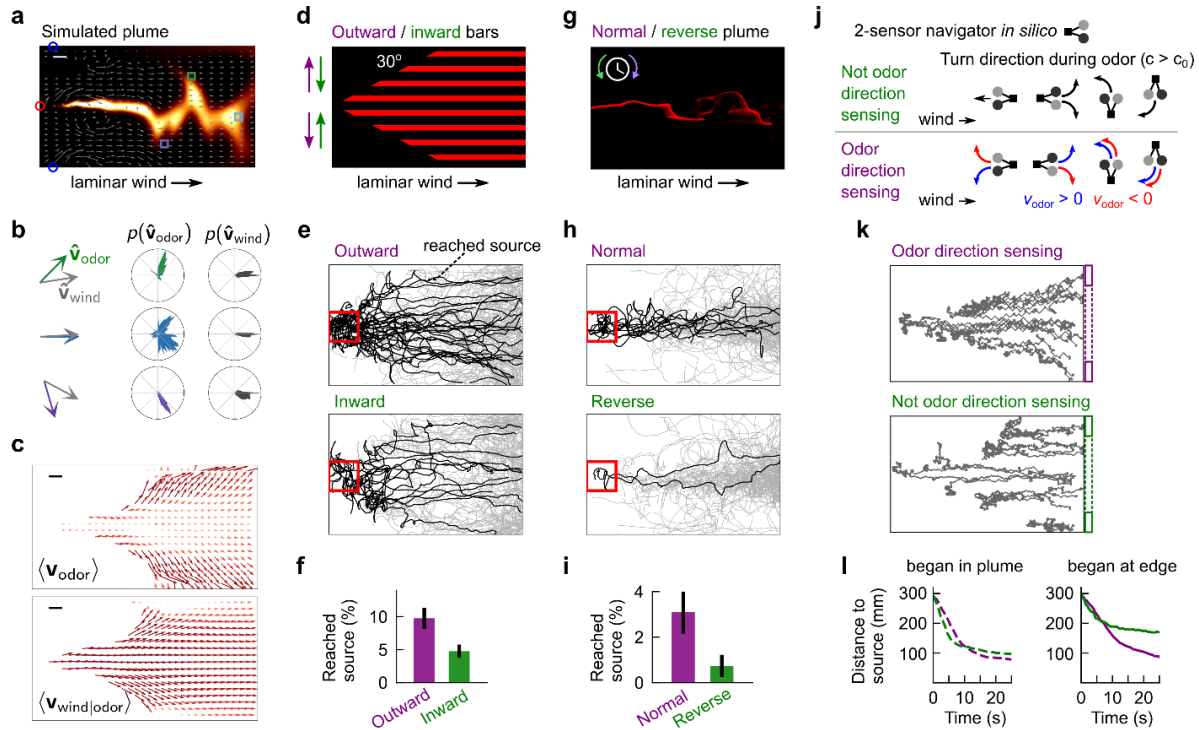

308

**Figure 5. Odor direction detection enhances natural plume navigation.** **a**, Snapshot of direct numerical simulation of complex odor plume from Fig. 1. Grey vector field: airflow at snapshot instant; white scale bar: 20 mm. **b**, (left column) Odor velocity vector at corresponding boxed locations in **a** along with airflow direction vector at same position. (middle column) Histogram of odor velocity at all times in simulation, at corresponding positions in **a**. (right column) Same for wind. **c**, (top) Odor velocity vector field, averaged over entire simulation. (bottom) Vector field of wind velocity, for times at which odor concentration is detectable, averaged over entire simulation. Vectors are colored by magnitude from low (yellow) to high (maroon). **d**, Illustration of fictive odor landscape in which bars move laterally outward or inward from center of the arena. Bars are restricted to a conical region approximating the envelope of a complex plume emanating from a source. Laminar wind flows at 150 mm/s. Experiments used 2 mm wide bars moving at 15 mm/s and spaced by either 5, 10, or 15 mm (data is pooled); these gave fictive odor hit frequencies in the range ~1-2 Hz, similar to the measured plume. **e**, Measured tracks for flies beginning in the rear 50 mm of the arena, navigating the plume depicted in **d**, for outward (top) and inward (bottom) moving bars. Black tracks: fly tracks that reached a 40 mm box around the fictive plume source.  $n = 312$ , 457 tracks for outward and inward bars. For visual comparison, the same number of tracks (312) are shown in both plots. **f**, Percentage of tracks beginning in rear 50 mm that reached the source (red box in **e**); means are 9.8% and 4.8% for the outward and inward plumes, respectively. SEMs determined by bootstrapping over individual trajectories; differences are significant ( $p < 0.01$ , two-tailed t-test). **g**, Snapshot of recorded plume from Fig. 1, optogenetically projected into the arena with normal playback or reverse playback. Reversing the playback preserves the spatial location of odor hits and other temporal features, but reverses the local odor direction. **h**, Measured tracks for flies navigating the complex plume depicted in **g**, when the video is played normally (top) or in reverse (bottom). Only considered are tracks beginning in the rear 50 mm of the arena and within 30 mm laterally from the plume centerline; further from the centerline, there is no detectable stimulus.  $n = 295$  and 277 tracks for normal and reverse playback, respectively. **i**, Percentage of tracks that reached the source; means are 3.0% and 0.7% for forward and reverse playback, respectively; differences are significant ( $p < 0.05$ , two-tailed t-test). **j**, 2-sensor robot navigator *in silico*. Agents are always oriented at  $0^\circ$ ,  $90^\circ$ ,  $180^\circ$  or  $270^\circ$ , and at each timestep turn  $90^\circ$  either left or right and move forward one step. Agents are either direction sensing (DS+) or not direction sensing (DS-) When odor concentration  $c$  exceeds some threshold  $c_0$ , DS- agents turn upwind. DS+ agents, for  $c > c_0$ , turn against the odor direction when oriented upwind or downwind; crosswind agents always turn upwind. DS+ agents infer odor direction using a simple spacetime correlation between their 2 sensors (Methods). **k**, Example trajectories of robots navigating plume in **a**, when they are initialized in the back of the arena. **l**, Distance to source over time, for those with (purple) and without (green) odor direction sensing ability, for robots initialized near the plume centerline ( $<120$  mm from axis; left plot) or near the plume edges (right plot). DS+ agents make significantly quicker progress when initialized near the plume edges.

309 likelihood to reach the odor source significantly degraded when the plume was played in reverse  
310 (3.0% versus 0.7%;  $p < 0.05$ , two-tailed t-test) (Fig. 5h-i). Together, these results indicate that the  
311 odor motion provides a directional cue complementary to odor gradients and wind motion, and  
312 strongly enhances navigation in complex odor plumes, even when all other aspects of the odor  
313 signal remain unchanged.

314 Finally, with an eye toward practical applications, we used *in silico* experiments to explore the  
315 impact of odor motion sensing for robots obeying a simplified navigation algorithm. Virtual agents  
316 detected odor signals using two spatially separated olfactory “sensors,” from which they inferred  
317 odor direction  $v_{\text{odor}} = \pm 1$  using a rudimentary HRC-like computation (details in Methods). We  
318 simulated two types of agents, with and without odor direction sensing (DS+ and DS- agents,  
319 respectively). Agents were always oriented in one of the 4 cardinal directions; at each frame, they  
320 turned 90° either left or right and moved forward one step. For undetectable odor concentrations  
321 (odor concentrations  $c$  less than some threshold  $c_0$ ), turns were randomly left or right with equal  
322 probability. For DS- agents, navigation followed a simple odor-gated anemotaxis strategy, in  
323 which agents moved upwind in the presence of odor. Specifically, for  $c > c_0$ , crosswind agents  
324 turned upwind, upwind agents maintained their heading, and downwind agents turned randomly  
325 left or right (Fig. 5j; first row). DS+ agents, on the other hand, obeyed a combination of odor-gated  
326 anemotaxis and odor-direction-biased taxis. Specifically, odor-elicited turns were shaped by odor  
327 direction whenever the wind provided no bias (Fig. 5j; second row). Thus, for  $c > c_0$ , crosswind  
328 agents still turned upwind, but those facing up- or downwind turned “against” the odor motion (left  
329 or right turns for  $v_{\text{odor}} = 1$  or  $v_{\text{odor}} = -1$ , respectively), provided the odor motion was above a  
330 detectable threshold.

331 Putting these agents in the simulated plume (Fig. 5a), we found that both DS+ and DS- agents  
332 starting in the back of the arena could eventually find their way to the odor source (Fig. 5k). In  
333 particular, both fared well when initialized near the plume axis – in fact, DS- agents reached the  
334 source slightly more efficiently, unhindered by suboptimal crosswind moves when already facing  
335 upwind (Fig. 5l; dashed line). However, if initialized closer to the plume edges, DS- agents’  
336 progress quickly deteriorated once they surpassed the conical extent of the plume (Fig. 5k-l).  
337 Meanwhile, DS+ agents were aided by lateral motion toward the plume axis (Fig. 5k), leading to  
338 significantly more sustained progress toward the source (Fig. 5l). This indicated that the clearest  
339 benefit of odor direction sensing was an increase in navigation reliability for sub-optimal starting  
340 positions. Thus, even a simplistic implementation of odor motion sensing can enhance the  
341 robustness of complex plume navigation, and could be incorporated straightforwardly to olfactory  
342 robots in a variety of existing schemes (Gumaste et al., 2020; Hengenius et al., 2021; Kowadlo  
343 and Russell, 2008; Liu et al., 2020; Riman et al., 2021).

344

## 345 DISCUSSION

346 Olfactory navigation relies on integrating various sensory signals that contain information about  
347 the odor source. Which features exist, and how much information they carry, can vary  
348 considerably between plume structures (Boie et al., 2018; Jayaram et al., 2021; Rigolli et al.,  
349 2021). Gradient sensing can provide reliable directional information when navigating laboratory-  
350 controlled plumes, such as static ribbons (Duistermars et al., 2009), or very close to the source  
351 of natural plumes before odor patches have dispersed (Supplementary Fig. 8). Further away from  
352 the source however, turbulent air motion stretches and fragments odor regions as they are carried

353 downstream, producing odor signals that are patchy and intermittent (Celani et al., 2014; Riffell  
354 et al., 2008), and which span many spatial scales – the so-called inertial convective range – from  
355 macroscopic eddies to molecular diffusion (Sreenivasan, 2019). In these regions, odor  
356 concentration gradients tend to point in random directions relative to the source, and so have  
357 limited value. Even in turbulent boundary layers, where concentrations are more regular (Connor  
358 et al., 2018), gradients can aid navigation, but require unnaturally amplifying the gradient to an  
359 extreme degree not consistent with data (Alvarez-Salvado et al., 2018).

360 Our work confronts some of the limitations of gradients by revealing an entirely distinct role for  
361 bilateral sensing: measuring odor direction by comparing concentrations in both space and time.  
362 This information stream is especially relevant to the statistical features present in the inertial  
363 convective range of turbulent plumes. Parallel to the plume axis, odor motion is mainly determined  
364 by, and redundant with, the average wind direction. But perpendicular to the plume axis,  
365 turbulence spreads odor packets by random continuous motions, with an effective diffusivity much  
366 larger than molecular diffusion (Pope, 2011; Taylor, 1922). What results is a flux of odor patches  
367 directed away from the plume centerline, providing a strong directional cue orthogonal – and thus  
368 complementary – to the mean wind. We corroborated this with theoretical analysis of a simple  
369 turbulent plume model (Methods), finding that the outward flow of odor motion we found in  
370 simulations (Fig. 5c) exists in turbulent odor plumes more generally (Supplementary Fig. 9a-b),  
371 and that lateral odor velocity components can be detected by computing local correlations  
372 between two nearby points (Supplementary Fig. 9c).

373 Insects universally bias their heading upwind when odors become longer, more intense, or more  
374 frequent (Alvarez-Salvado et al., 2018; Baker et al., 2018; Demir et al., 2020; Kanzaki et al., 1992;  
375 Kennedy and Marsh, 1974; Mafra-Neto and Cardé, 1994; van Breugel and Dickinson, 2014). This  
376 strategy fails at the plume edges, where insects then resort to local search or downwind or  
377 crosswind motion to re-enter the plume (Alvarez-Salvado et al., 2018; Budick and Dickinson,  
378 2006; Mafra-Neto and Cardé, 1994). In this sense, the value of the lateral odor motion is evident,  
379 providing cues about which crosswind direction to take to reenter the plume. Our work does not  
380 explore odor direction sensing in the z-dimension – say, for flying insects. The role of odor  
381 direction sensing would likely be different, since odors traveling upward would not be sensed  
382 bilaterally unless the fly were flying with nonzero roll. In flight, directional cues from the optic flow  
383 also shape navigation (Budick et al., 2007). How odor direction contributes in this locomotor  
384 regime remains an avenue for future work.

385 Our setup allows us to test the predictions of the HRC using artificial correlation-type stimuli which  
386 would be prohibitive to reproduce with natural odors. In particular, we generated a *reverse phi*  
387 illusory percept for negative correlations, an signature of correlation-based algorithms observed  
388 in visual motion detection in flies (Clark et al., 2011; Eichner et al., 2011; Salazar-Gatzimas et al.,  
389 2018; Salazar-Gatzimas et al., 2016; Tuthill et al., 2011) and other species (Hassenstein and  
390 Reichardt, 1956; Livingstone et al., 2001; Orger et al., 2000), including humans (Anstis and  
391 Rogers, 1975). The HRC computes only second-order correlations – correlations between pairs  
392 of points in space and time – but, at least in vision, higher-order correlations can elicit direction-  
393 selective behaviors (Clark et al., 2014), and may improve motion detection by exploiting the  
394 statistics of natural scenes (Chen et al., 2019; Fitzgerald and Clark, 2015; Fitzgerald et al., 2011).  
395 Natural odor landscapes also exhibit universal highly-structured statistics (Celani et al., 2014) to  
396 which odor direction selective computations may likewise be tuned.

397 In mouse retina and fly vision, motion detection circuits have been characterized in detail and  
398 have many parallels (Borst and Helmstaedter, 2015; Clark and Demb, 2016), though much  
399 remains unknown. In both, visual motion is computed separately for ON and OFF edges (Euler et  
400 al., 2002; Famiglietti, 1983; Maisak et al., 2013), and it is likely that a similar split may exist in  
401 odor motion computations, given the difference in responses to ON and OFF edges in the  
402 presence of wind (Supplementary Fig. 5). In contrast to the canonical HRC architecture, three  
403 inputs feed into direction selective neurons in the fly visual circuit (Shinomiya et al., 2019;  
404 Takemura et al., 2017). This is unlikely to be the case in olfaction, if direction sensing is indeed  
405 enabled by bilateral segregation. Still, our results do not implicate any specific circuit architecture  
406 or mechanism. In fly vision, direction selective behaviors and signals are frequently well-described  
407 by a pairwise correlator model (Clark et al., 2011; Haag et al., 2004), while the underlying neural  
408 architectures and functional interactions remain incompletely understood and quite complex  
409 (Badwan et al., 2019; Gruntman et al., 2018, 2019; Haag et al., 2016; Salazar-Gatzimas et al.,  
410 2018; Shinomiya et al., 2019; Strother et al., 2017; Takemura et al., 2017; Wienecke et al., 2018).  
411 Ultimately, comparisons between odor and visual motion detection systems will reveal how  
412 circuits in these distinct modalities accomplish similar tasks.

413 Where could direction selectivity occur in the olfactory circuit? Most ORNs project to both antennal  
414 lobes, but ipsilateral and contralateral signals differ in magnitude and timing (Gaudry et al., 2013;  
415 Tobin et al., 2017), which could be amplified further downstream to enact bilateral computations.  
416 One potential region of interest is the third-order olfactory center, the lateral horn (LH), which  
417 mediates innate odor responses (Jefferis et al., 2007). Output neurons from the LH to the  
418 ventrolateral protocerebrum (VLP) have been shown to enhance existing bilateral differences  
419 through contralateral inhibition (Mohamed et al., 2019). Though this may be an isolated effect,  
420 the VLP region is highly suggestive: it lives in the ventral region of the LH, which receives inputs  
421 from wind-sensing wedge neurons – a potential integration center for bilateral odor information  
422 and wind (Dolan et al., 2019).

423 The lack of smooth concentration fields in naturalistic plumes has inspired a number of studies  
424 focusing on how animals use the temporal features of the odor signal, such as the frequency of  
425 encounters with odorized air packets. This reliance on timing is enabled by the remarkable degree  
426 of temporal precision in olfactory circuits (Ackels et al., 2021; Gorur-Shandilya et al., 2017; Martelli  
427 et al., 2013; Park et al., 2016; Shusterman et al., 2011). Here, we show that odor timing can be  
428 combined with spatially-resolved sensing to produce a complementary information stream,  
429 encoding directions that do not exist in the only other directional cue, the wind. Our work reveals  
430 a novel role for bilateral sensing in turbulent plume navigation, beyond measuring simple  
431 gradients.

432

## 433 **ACKNOWLEDGEMENTS**

434 We thank Brian DeAngelis for helpful conversations and advice on the design of the optogenetic  
435 component to the walking assay, Omer Mano for help with projector troubleshooting, and Aarti  
436 Sehdev for help with behavioral experiments, fly rearing, and discussions. We also thank Viraj  
437 Jayaram, John Carlson, Jamie Jeanne, and members of the Emonet Lab for helpful discussions  
438 and advice on the project. NK was supported by a postdoctoral fellowship through the Swartz  
439 Foundation for Theoretical Neuroscience, by postdoctoral fellowship NIH F32MH118700, and by  
440 postdoctoral fellowship NIH K99DC019397. MD and TE were partially supported by the Program  
441 in Physics, Engineering, and Biology at Yale and by NIH R01GM106189 and R01GM138533. BM  
442 and MR were supported by National Science Foundation grant IIS-1631864. DAC was supported  
443 by NIH R01EY026555 and NIH R01NS121773.

444

## 445 **COMPETING INTERESTS**

446 The authors declare no competing interests.

447

## 448 **CONTRIBUTIONS**

449 NK, DC and TE designed the research. NK and MD built the assay with inputs from DC and TE.  
450 NK performed all experiments, data analysis, and agent-based simulations. MD performed the  
451 electrophysiology. BM and MR performed the numerical simulations for Fig 5. NK and TE  
452 performed the theoretical analysis of the turbulent plume. NK, DC and TE validated the data. NK,  
453 DC, and TE discussed the data analysis. NK, DC, and TE wrote the initial draft and all revisions.  
454 All authors approved the final manuscript.

455

## 456 **METHODS**

### 457 **Fly strains and handling**

458 Flies were reared at 25°C and 60% humidity on a 12 hour/12 hour light-dark cycle in plastic vials  
459 containing 10 mL standard glucose-cornmeal medium (i.e. 81.8% water, 0.6% agar, 5.3%  
460 cornmeal, 3.8% yeast, 7.6% glucose, 0.5% propionic acid, 0.1% methylparaben, and 0.3%  
461 ethanol. Media was supplied by Archon Scientific, NC). All flies used in behavioral experiments  
462 were females. Between 10 and 30 females were collected for starvation and placed in empty vials  
463 containing water-soaked cotton plugs at the bottom and top. All flies were 3–10 days old and 3  
464 days starved when experiments were performed. Optogenetically active flies were fed 1 mM all  
465 trans-Retinal (ATR) (MilliporeSigma; previously Sigma Aldrich) dissolved in water. ATR was fed  
466 to flies 1 day prior to recording.

467 All flies used throughout the study had copy of the *GMR-hid* gene to make them blind. Optogenetic  
468 activation was achieved by expressing Chrimson (20X-UAS-CsChrimson) in *Orco*-expressing  
469 olfactory receptor neurons (*Orco*-GAL4) in almost all experiments. The one exception was the  
470 single-*Or* experiments (Supplementary Fig. 3c-d), which expressed Chrimson in only neurons  
471 expressing the olfactory receptor *Or42b*.

## 472 Behavioral assay and optogenetic stimulation

473 The fly walking assay is identical to the one used in a previous study (Demir et al., 2020). All  
474 experiments were done in a behavioral room held at 21-23°C and 50% humidity. The walking  
475 arena is 270x170x10mm (see Fig. 2a), and consists of top and bottom glass surfaces and acrylic  
476 sidewalls. The upwind end is an array of plastic coffee straws, which laminarize the airflow (when  
477 wind is turned on); downwind end is a plastic mesh. For experiments with wind, dry air is passed  
478 through the straws at a flow rate giving a laminar flow at 150 mm/s within the arena. Flies are  
479 introduced by aspirating through a hole near the downwind plastic mesh. Flies were illuminated  
480 using 850 nm IR LED strips (Waveform Lighting) placed parallel to the acrylic sidewalls.

481 Experiments were recorded with a FLIR Grasshopper USB 3.0 camera with IR-pass filter at 60  
482 Hz. Optogenetic stimuli were delivered using a LightCrafter 4500 digital light projector mounted  
483 310 mm above the arena, illuminating an area larger than in the original method (DeAngelis et  
484 al., 2020). Only the red LED (central wavelength 627 nm) was used throughout this study. We  
485 used the native resolution of the projector (912 x 1140 pixels), which illuminated the entire walking  
486 arena with pixels of size 292  $\mu\text{m}$  (along wind axis) x 292 (perpendicular to wind axis)  $\mu\text{m}$ . The  
487 majority of our experiments used a 60 Hz stimulus update rate; the exception is the glider  
488 experiments (Supplementary Fig. 7d), for which we used a 180 Hz update rate to get faster  
489 updating stimuli. The average intensity of the red light within the walking arena was 4.25  $\mu\text{W}/\text{mm}^2$ .  
490 Though all data presented in this article used blind flies, initial exploratory experiments used flies  
491 that were not blind. To remove visual effects from the stimulating red light, we shone green light  
492 using an LED (Luxeon Rebel LED 530 nm) throughout the arena to flood the visual response.  
493 Though this was not necessary for blind flies, we retained the green light throughout the  
494 experiments presented here to compare to past data.

495 The projector and camera have distinct coordinate axes – camera and projector pixels are  
496 different sizes and their native coordinates systems are not even the same handedness. To infer  
497 the virtual perceived stimuli for navigating flies, the transformation between a 2D camera  
498 coordinate  $\mathbf{x}_{\text{cam}}$  and a 2D stimulus coordinate  $\mathbf{x}_{\text{stim}}$ . We assume that the two are related by a  
499 combination of linear transformations and translations:

$$500 \quad \mathbf{x}_{\text{cam}} = \mathbf{A}\mathbf{x}_{\text{stim}} + \mathbf{B}.$$

501 To estimate the matrix  $\mathbf{A}$  and vector  $\mathbf{B}$ , 3 mm diameter dots were projected at random locations  
502  $\mathbf{x}_{\text{stim}}^i$  in the arena while recording with the camera; camera coordinates  $\mathbf{x}_{\text{cam}}^i$  were determined in  
503 the imaged frame using the SimpleBlobDetector function in OpenCV. The 6 elements of  $\mathbf{A}$  and  $\mathbf{B}$   
504 were then determined by minimized the least squares difference:

$$505 \quad C = \sum_i (\mathbf{x}_{\text{cam}}^i - \mathbf{A}\mathbf{x}_{\text{stim}}^i - \mathbf{B})^2$$

506 We verified manually that this procedure generated accurate transformations. We generated all  
507 stimuli using custom-written scripts in Python 3.7.4, and delivered these stimuli to the projector  
508 using the Python package PsychoPy, version 2020.2.4.post1.

509

510

511



## 512 **Electrophysiology**

513 Single sensillum recordings from *Drosophila* antennae were performed as described previously  
514 (Gorur-Shandilya et al., 2017). The recording electrode was inserted into a sensillum on the  
515 antenna of an immobilized fly and a reference electrode was placed in the eye. Electrical signals  
516 were amplified using an Ext-02F extracellular amplifier (NPI electronic instruments). The ab2  
517 sensillum was identified by i) its size and location on the antenna, and ii) test pulses of Ethyl 3-  
518 HyrdoxyButyrate, to which the B neuron is very sensitive. Spikes from the A and B neurons in this  
519 sensillum were identified and sorted as described previously (Gorur-Shandilya et al., 2017), using  
520 a spike-sorting software package written in MATLAB (Mathworks, Inc.) ([https://github.com/](https://github.com/emonetlab/spikesort)  
521 [emonetlab/spikesort](https://github.com/emonetlab/spikesort)).

522

## 523 **Experimental protocol**

524 Experiments were carried out between 9 and 12 AM. All videos were 1 minute long, unless  
525 otherwise noted. Flies numbering between 10 and 30 were aspirated into the arena and let to  
526 acclimate for 2 minutes before experiments began. Before all experiments, optogenetic activation  
527 was verified by presenting static fictive odor ribbons (as in Supplementary Fig. 2c) with laminar  
528 wind for 120 seconds, and ensuring that flies followed the ribbons upwind as a positive control.  
529 Unless otherwise noted, each experiment ran for 60 seconds, with 60 seconds in between  
530 experiments. Throughout, experiments were interleaved such that the directions of the moving  
531 stimuli were randomized. No more than 30 videos were recorded on a single set of flies.

532

## 533 **Quantification of fly behavior and perceived fictive odor stimulus**

### 534 Extraction of fly position, speed, and orientation from videos

535 All scripts were written in Python 3.7.4. Fly centroids were determined using SimpleBlobDetector  
536 in OpenCV, assuming a minimum area of 5 mm<sup>2</sup>. Given the centroids, fly identities were  
537 determined using custom tracking scripts. Briefly, centroids in subsequent frames were matched  
538 to the nearest centroid, and if the centroids could not be matched, they were marked as  
539 disappeared. Flies marked as disappeared for more than 30 frames (0.5 seconds) were then  
540 deregistered. Subsequent detected centroids were then marked as new fly tracks. Fly orientations  
541  $\theta$  were determined by first using the *canny* function in the Python module *scikit-image* to  
542 determine the points defining the fly edges around the centroid, then fitting these to an ellipse  
543 using custom-written Python scripts. Fly orientations are defined on the interval  $[0, 360^\circ]$ , but  
544 ellipse-fitting does not distinguish head ( $0^\circ$ ) from rear ( $180^\circ$ ). We properly resolved this using the  
545 fly velocity (below).

546 The above data defines the fly positions  $(x, y)$  and orientations  $\theta$ . To remove measurement noise,  
547 we filtered each of these quantities with a Savitsky-Golay filter using a 4<sup>th</sup>-order polynomial and  
548 window size of 21 points (to avoid branch cuts in  $\theta$ , it was first converted to an un-modded  
549 quantity). Velocities  $\dot{x}$  and  $\dot{y}$  and angular velocity  $\dot{\theta}$  were defined by taking the analytical  
550 derivative of the fitted Savitsky-Golay polynomials for  $x, y$ , and  $\theta$ . To resolve the two-fold symmetry  
551 in the fitted ellipses, and therefore distinguish the fly head from the rear, we used the fly velocity.  
552 For fly speeds greater than a given speed threshold, we matched the orientation to the fly velocity  
553 vector since flies walked forward. For other times, we matched the fly heading at the beginning

554 and end of bouts when fly speed was below the speed threshold. The result was an estimate that  
555 may still have errors which occur as unnatural jumps in orientation. We repeated this process for  
556 various speed thresholds from 1 to 4 mm/s, and chose the orientation trace with the least number  
557 of jumps. We verified manually with several tracks that this procedure was highly reliable.

558 We noticed that during the experiments, particularly those with long fictive odor encounters such  
559 as the wide bars in Figs. 2 and 3, there was a slow, gradual bias toward one side of the arena  
560 (along the shorter axis of the arena). This only occurred for optogenetically active flies, and we  
561 reasoned it was due to a shadowing effect of the projector light from one antenna onto the other,  
562 since the projector lens is nearer to the bottom of its projected image. This shadowing effect  
563 essentially creates a static fictive odor gradient across the antenna. To account for this bias, we  
564 repeated all experiments that had an asymmetry in the perpendicular direction, such as bars  
565 perpendicular to the wind (Fig. 3d; 3<sup>rd</sup> row), in both directions. We then averaged the turning  
566 biases from these two directions, after flipping the orientations appropriately. This would retain  
567 the effects due to direction sensing but remove the bias, under the assumption that this bias was  
568 an additive effect.

569

#### 570 Estimation of perceived fictive odor stimulus in antennae

571 Given these smoothed and corrected  $x, y, \theta$ , we then estimated the perceived fictive odor signal  
572 in the antenna region by defining a virtual antenna at a location 1.5 mm from its centroid along  
573 the ellipse major axis toward the fly head. To generate stable estimates – i.e. not relying on a  
574 single pixel value – we use the stimulus value averaged over a box of 0.25 mm<sup>2</sup> around this  
575 location. Stimulus values in the antennal region are not measured by imaging, since the images  
576 are IR-pass filtered. Rather, they are obtained from knowledge of the stimulus pattern and the  
577 stimulus-to-camera coordinate transformation defined above. In PsychoPy, stimulus values are  
578 defined as 8-bit integers, from 0 to 255, but in practice we only deliver stimuli as max intensity  
579 (255) or 0. Accordingly, we treat the signal in the virtual antenna as binary, equal to 1 when the  
580 average stimulus value in the 0.25 mm<sup>2</sup> region is above 200, and 0 otherwise.

581

#### 582 Calculation of turning bias at bar edges

583 For the bar stimuli in Figs. 2-3, we identified ON and OFF edge hits as the times that the antennal  
584 signal switched from 0 to 1 or 1 to 0, respectively, where this binarization was calculated as  
585 described above. Correlated noise and glider stimuli (Fig. 4) were presented in blocks of 4s  
586 stimulus interleaved with 4s of no stimulus; thus the stimulus ON times were 0, 8, 16 seconds,  
587 etc. To calculate turning biases, we followed prior work and considered saccadic turning events,  
588 identified as points at which the absolute value of the angular velocity exceeded 100°/s, and  
589 ignored small jitters. Turn biases at a given time  $t_i$  (e.g. at an ON or OFF edge hit (Fig. 2-3)), were  
590 defined as the sign of the change in fly orientation from  $t_i + 150$  ms to  $t_i + 300$  ms, provided the  
591 absolute value of angular velocity in that window exceeded 100°/s at some point in that window.  
592 We used this 150 ms latency after  $t_i$  to account for uncertainties in  $t_i$  due to uncertainties in exact  
593 position of the antenna, which we estimated as being upper bounded by 2 mm. For correlated  
594 noise and glider stimuli, we considered orientation changes from  $t_i$  to  $t_i + 300$  ms; the 150 ms  
595 latency was not needed in this case since the signal was independent of fly behavior, so the hit  
596 time was known to the precision of the inverse frame rate (16 ms). For all plots, to remove tracks

597 in which flies may have been turning before the hit, we ignored points for which the absolute  
598 angular velocity exceeded 100°/s between 300 ms and 150 ms before the hit.

599

## 600 Plume simulations

601 Direct numerical simulations were generated using the CFX® hydrodynamic simulation software  
602 package of ANSYS 2019. Parameters were chosen to emulate the flow and intermittent odor  
603 structure of the plume analyzed in Fig. 1 (Demir et al., 2020). An odorant with molecular diffusivity  
604  $D_m = 7.3e-6$  m<sup>2</sup>/s was injected mid-stream (vertically and horizontally). The odorant was modeled  
605 as a conservative, neutrally buoyant tracer. The dimensions of the computational model domain  
606 were 30x18x1 cm, approximately matching those of the walking arena (Demir et al., 2020). The  
607 computational air inlet boundary was modeled as a uniform velocity condition, representing an  
608 idealized collimated flow. The outlet boundary condition was modeled as a zero-pressure gradient  
609 opening allowing for bidirectional flow across the boundary. Walls were modeled using  
610 hydraulically smooth, no-slip boundary conditions. To reproduce the stochastic airjets creating the  
611 complex flow and plume, alternating jet pulses of air were applied from two orifices on opposite  
612 sides of the flume. The time series of pulses were identical to the experiments (Demir et al., 2020).  
613 The model domain was broken up into  $4.7e6$  tetrahedral elements where velocity and  
614 concentration were computed, with the largest element's length at 5 mm with an inflation layer  
615 along the domain boundaries and a refined mesh around the inlet orifices.

616 The flow was simulated at a 2.5 ms time step using a  $k-\epsilon$  eddy viscosity model (Pope, 2011),  
617 which solves the Reynold-averaged Navier Stokes equations, where the momentum equation is  
618 defined as:

619

$$620 \quad \frac{\partial \rho U_i}{\partial t} + \frac{\partial}{\partial x_j} (\rho U_i U_j) = -\frac{\partial p}{\partial x_i} + \frac{\partial}{\partial x_i} \left( \mu_{\text{eff}} \left( \frac{\partial U_i}{\partial x_j} + \frac{\partial U_j}{\partial x_i} \right) \right)$$

621

622 and the continuity equation as:

623

$$624 \quad \frac{\partial p}{\partial t} + \frac{\partial}{\partial x_j} (\rho U_j) = 0,$$

625

626 where  $\rho$  is the fluid density,  $p$  is pressure and  $\mu_{\text{eff}}$  is the effective fluid viscosity. The turbulent  
627 eddy viscosity is treated analogously to viscosity in laminar flow such that  $\mu_{\text{eff}} = \mu_t + \mu$  where  $\mu_t$   
628 is the turbulent viscosity and  $\mu$  the fluid viscosity. The  $k-\epsilon$  model assumes the local turbulent  
629 viscosity is related to the local turbulent kinetic energy ( $k$ ) and the eddy dissipation rate ( $\epsilon$ ) as  
630 follows:

$$631 \quad \mu_t \propto \rho \frac{k^2}{\epsilon}$$

632

633 The advection-diffusion equation for conservative tracers was used to model the chemical  
634 transport of the odorant:

635

$$636 \quad \partial_t C_x + \mathbf{u} \cdot \nabla C = (D_x + \epsilon) \nabla^2 C_x$$

637

638 where  $C_x$  is the tracer concentration,  $\mathbf{u}$  is the velocity field,  $D_x$  is the molecular diffusivity and  $\varepsilon$  is  
639 the local eddy diffusivity solved from the turbulence model. For all further analysis, we used the  
640 concentration and velocity in a plane 1 mm above the bottom of the domain, in the approximate z-  
641 plane of the fly antennae.

642

643

## 644 **Mathematical modeling and data analysis**

### 645 Inter-antennal latency of edge hit $\Delta T$

646 The inter-antennal latency  $\Delta T$  as a function of fly walking speed  $|\mathbf{v}_{\text{fly}}|$  and bar speed  $|\mathbf{v}_{\text{bar}}|$  can be  
647 calculated with basic geometric considerations. Here, we assume that the fly speed along the bar  
648 direction is sufficiently slow such that the bar passes over the fly. Consider a coordinate system  
649 in the frame of the moving bar, where the bar direction is  $+y$  (i.e. the bar's edge is in  $x$ ). The fly  
650 velocity in this frame is

$$651 \quad \mathbf{v}_r = [ -|\mathbf{v}_{\text{fly}}| \sin \phi, |\mathbf{v}_{\text{fly}}| \cos \phi - |\mathbf{v}_{\text{bar}}| ]$$

652 where  $\phi$  is the angle of rotation from  $\mathbf{v}_{\text{bar}}$  to  $\mathbf{v}_{\text{fly}}$  in the experimenter frame. The inter-antennal  
653 latency  $\Delta T$  is then the projection of the antennal spacing  $L$  along  $\mathbf{v}_{\text{bar}}$  divided by the projection of  
654  $\mathbf{v}_r$  along  $\mathbf{v}_{\text{bar}}$ . The former is  $L \sin \phi$  and the latter is the  $y$ -component of  $\mathbf{v}_r$ ; the sign of  $L \sin \phi$  is  
655 treated as meaningful, so that a positive/negative value means the left/right antenna is hit first.  
656 Thus:

$$657 \quad \Delta T = \frac{L \sin \phi}{|\mathbf{v}_{\text{bar}}| - |\mathbf{v}_{\text{fly}}| \cos \phi}$$

658 where the sign is given by the numerator since the denominator is always positive for bars passing  
659 over the fly.

660 This expression ignores the fly's angular velocity while walking. Assuming that the fly is walking  
661 forward while also turning at a rate  $\omega$ , then the total accumulation of orientation over the  
662  $\Delta T$  interval is  $\omega \Delta T$ , which for typical values of the maximum rotation rate during normal turns  $\omega \sim$   
663  $300^\circ/\text{s}$  and typical inter-antennal latencies without turning,  $\Delta T < 15$  ms, is less than 5 degrees.  
664 This would be if the fly were turning at a maximum angular velocity. For more typical jitters,  
665 rotation rates are approximately  $20^\circ/\text{s}$  (Demir et al., 2020), giving an accumulated angle during of  
666 less than 1 degree. If we incorporate this error as an uncertainty on  $\phi$ ,  $\delta\phi$ , then  $\Delta T$  acquires an  
667 error of

$$668 \quad \delta\Delta T = \delta\phi \left[ \frac{L \cos \phi}{|\mathbf{v}_{\text{bar}}| - |\mathbf{v}_{\text{fly}}| \cos \phi} + \frac{|\mathbf{v}_{\text{fly}}| L \sin^2 \phi}{(|\mathbf{v}_{\text{bar}}| - |\mathbf{v}_{\text{fly}}| \cos \phi)^2} \right]$$

669

670 With the values assumed throughout,  $|\delta\Delta T| < 1$  ms, so  $\omega$  is safely ignored to the resolution of our  
671 experiments.

672

673

674 HRC output versus  $\Delta T$  for traveling edges

675 Our prediction for the turning bias as a function of the latency  $\Delta T$  at which an edge of odor hits  
 676 the right antenna after hitting the left, is based on the output  $r(t)$  of the mirror-symmetrized  
 677 Hassenstein-Reichardt correlator (Salazar-Gatzimas et al., 2016). To calculate  $r(t)$ , we model  
 678 the correlator architecture as depicted in Fig. 4a. Specifically, the time-varying signals from the 2  
 679 sensors are  $s_L(t)$  and  $s_R(t)$ . In one arm of the computation,  $s_L(t)$  is linearly filtered with an  
 680 exponential  $\frac{1}{\tau}e^{-\frac{t}{\tau}}$ , while  $s_R(t)$  is transmitted unchanged; these are then multiplied. For a traveling  
 681 ON edge moving left to right, we have  $s_L(t) = H(t)$  and  $s_R(t) = H(t - \Delta T)$ , where  $H(\cdot)$  is the  
 682 Heaviside function. Then the product of the filtered values is:

$$\begin{aligned} 683 \quad s_{LR}(t) &= H(t - \Delta T) \frac{1}{\tau} \int_{-\infty}^t e^{-\frac{t-t'}{\tau}} H(t') dt' \\ 684 \quad &= H(t - \Delta T) \frac{1}{\tau} \int_0^t e^{-\frac{t-t'}{\tau}} dt' \\ 685 \quad & \\ 686 \quad &= H(t - \Delta T) \left(1 - e^{-\frac{t}{\tau}}\right) \end{aligned}$$

687 The other arm is similar, except that  $s_2(t)$  is filtered and  $s_1(t)$  is transmitted unchanged. Then the  
 688 product of the filtered inputs is:

$$\begin{aligned} 690 \quad s_{RL} &= H(t) \frac{1}{\tau} \int_{-\infty}^t e^{-\frac{t-t'}{\tau}} H(t' - \Delta T) dt' \\ 691 \quad &= H(t - \Delta T) \left(1 - e^{-\frac{t-\Delta T}{\tau}}\right) \\ 689 \quad & \end{aligned}$$

692 The correlator output is therefore:

$$693 \quad r(t) = s_{LR}(t) - s_{RL}(t) = H(t - \Delta T) \left( e^{-\frac{t-\Delta T}{\tau}} - e^{-t/\tau} \right)$$

694 Assuming that flies sense odor direction using this computation, the output of the correlator,  $r(t)$ ,  
 695 must be converted to a behavior; here, we model this behavior as the turning bias being  
 696 proportional to  $\int r(t)dt$ :

$$\begin{aligned} 697 \quad \text{Turning bias} &\propto \int_{-T_-}^{T_+} r(t) dt = \int_{\Delta T}^{T_+} \left( e^{-\frac{t-\Delta T}{\tau}} - e^{-t/\tau} \right) dt \\ 698 \quad &\propto \left(1 - e^{-\frac{\Delta T}{\tau}}\right) \end{aligned}$$

699 provided that behavioral timescales  $T_-$  and  $T_+$ , over which the correlator response is integrated  
 700 to produce the turning response, are large compared to  $\tau$  and to  $\Delta T$ . Long after the edge hit,  $t \gg$   
 701  $T_-$ , the signals are both  $s_L = s_R = 1$ , giving an HRC output of 0, as expected for the anti-symmetric  
 702 architecture.

703 To estimate the filtering constant  $\tau$ , we minimize:

704 
$$C(A, \tau) = \left[ \text{Turning bias}(\Delta T) - A \left( 1 - e^{-\frac{\Delta T}{\tau}} \right) \right]^2$$

705 over  $A, \tau$ . The turning bias is plotted in increments of  $\Delta T = 4$  ms, where the value at a given  $\Delta T$   
 706 includes values from  $\pm 4$  ms. Neighboring points therefore contain overlapping data; this has the  
 707 effect of smoothing – but not biasing – the turning bias vs.  $\Delta T$  curve.

708 Responses to rightward moving OFF edges are analogous. The signal switches from 1 to 0 at the  
 709 OFF edge (set it to  $t = 0$ ), so the signal on the left sensor is  $s_L(t) = 1 - H(t)$  and for the right  
 710 sensor is  $s_R = 1 - H(t - \Delta T)$ . Then one arm of the HRC is:

711 
$$s_{LR}(t) = (1 - H(t - \Delta T)) \frac{1}{\tau} \int_{-\infty}^t e^{-\frac{t-t'}{\tau}} (1 - H(t')) dt'$$

712 
$$= (1 - H(t - \Delta T)) \frac{1}{\tau} \int_{-\infty}^0 e^{-\frac{t-t'}{\tau}} dt' \quad t > 0$$

713 
$$= e^{-\frac{t}{\tau}}, \quad 0 < t < \Delta T$$

714 and  $s_{LR}(t) = 0$  for  $t > \Delta T$  and  $s_{LR}(t) = 1$  for  $t < 0$ . The other arm output is simply  $s_{RL} = 1$  for  $t <$   
 715  $0$  and  $s_{RL} = 0$  for  $t > 0$ , since the non-delayed arm drops to zero as soon as the edge passes it  
 716 at  $t = 0$ . Thus the output is:

717 
$$r(t) = s_{LR}(t) - s_{RL}(t) = e^{-\frac{t}{\tau}} H(t) (1 - H(t - \Delta T))$$

718 Integrating this quantity over time gives the same turning bias as the ON edge.

719

720 Generation of correlated noise stimuli and  $C(\Delta x, \Delta t)$

721 Correlated noise stimuli were generated as previously described (Salazar-Gatzimas et al., 2016).  
 722 We used optogenetic bars that were parallel to the short axis ( $y$ ) of the arena (e.g. perpendicular  
 723 to the wind direction, which runs along  $x$ ). Each bar has a width of one  $x$ -pixel – thus, refer to an  
 724  $x$ -pixel as a “pixel,” since correlations are defined just in the  $x$ -direction. The stimulus value (where  
 725  $-1$  and  $1$  are for dark and bright bars, respectively) of a bar at pixel location  $x$  and time  $t$  is given  
 726 by  $c(x, t) = \text{sgn}(\eta(x, t) + \alpha \eta(x + \beta \Delta x, t + \Delta t))$ , where each  $\eta(x, t)$  is independently chosen from a  
 727 standard normal distribution.  $\Delta x$  is the pixel spacing;  $\Delta t$  is the inter-frame interval. The constant  
 728  $\beta$  governs the direction of the correlations:  $+1$  for stimuli correlated in the  $+x$  direction (“with-wind”  
 729 in the main text) and  $-1$  for stimuli correlated in the  $-x$  direction (“against-wind”). The constant  $\alpha$   
 730 governs the polarity of the correlations;  $+1$  or  $-1$  for positive or negative correlations, respectively.

731 The correlations can be computed straightforwardly (Salazar-Gatzimas et al., 2016). Assume that  
 732  $\alpha = \beta = 1$ ; the other cases are analogous. The correlations between two pixels separated by  
 733 spacing  $x'$  and timing  $t'$  we denote  $C(x', t') = \langle c(x, t) c(x + x', t + t') \rangle$ . In general,

734 
$$C(x', t') = \langle \text{sgn}((\eta_1 + \eta_2)(\eta_3 + \eta_4)) \rangle$$

735 where  $\eta_i$  is one sample of  $\eta$ . For most choices of  $t', x'$ , all  $\eta_i$  are distinct, so the correlation reduces  
 736 to 0 since the sums are independent. For  $x' = t' = 0$ , the correlation reduces to the variance of  
 737  $c(x, t)$ , which is 1. However, for  $t' = \Delta t$  and  $x' = \Delta x$ ,  $\eta_2 = \eta_3$ . Then,

$$\begin{aligned}
 738 \quad C(x', t') &= \langle \text{sgn}((\eta_1 + \eta_2)(\eta_2 + \eta_4)) \rangle \\
 739 \quad &= \langle \text{sgn}((\eta_1 - \eta_2)(\eta_2 - \eta_4)) \rangle
 \end{aligned}$$

740 since the random variables are symmetric about 0. The sign depends only on the ordering of the  
 741  $\eta_i$ , which are 3 independent samples from a standard normal distribution. There are 6 ways to  
 742 uniquely order the  $\eta_i$ , only two of which give a positive sign ( $\eta_1 > \eta_2 > \eta_4$  and  $\eta_1 < \eta_2 < \eta_4$ );  
 743 thus the expected value is 1/3 (Salazar-Gatzimas et al., 2016). An analogous property holds for  
 744  $t' = -\Delta t, x' = -\Delta x$ . Finally, the  $\alpha$  and  $\beta$  factors are incorporated straightforwardly as scale factors,  
 745 giving:

$$746 \quad C(x', t') = \delta_{x',0} \delta_{t',0} + \alpha \frac{1}{3} (\delta_{x',\beta\Delta x} \delta_{t',\Delta t} + \delta_{x',-\beta\Delta x} \delta_{t',-\Delta t})$$

747 Note that the correlation can be calculated by averaging over all of spacetime, or just in space for  
 748 a fixed set of times, or just in time for a fixed set of points. The latter is our interpretation for the  
 749 HRC output from fixed antennae, assuming the correlation direction is perpendicular to the fly  
 750 body.

751

### 752 Generation of glider stimuli

753 Here, the stimulus value of a bar at pixel location  $x$  and time  $t$  is given by  $c(x, t) = B(x - \beta t \Delta x / \Delta t)$ ,  
 754 where  $B = 2X - 1$  with  $X \sim \text{Bernoulli}(p = 0.5)$ ,  $\Delta x$  is the pixel spacing, and  $\Delta t$  is the inter-frame  
 755 interval. The correlation between two pixels separated by spacing  $x'$  and timing  $t'$  is

$$756 \quad C(x', t') = \langle \text{sgn}[B(x - \frac{\beta t \Delta x}{\Delta t}) B(x + x' - \frac{\beta t \Delta x}{\Delta t} - \frac{\beta t' \Delta x}{\Delta t})] \rangle.$$

757 Then,  $C(x', t') = 1$  when  $\frac{x'}{t'} = \frac{\beta \Delta x}{\Delta t}$  - i.e., the correlation matrix has a diagonal or antidiagonal  
 758 structure for  $\beta = 1$  and  $\beta = -1$ , respectively. These stimuli are a class of *glider* stimuli with a two-  
 759 point correlation structure. Visually, these gliders are a frozen pattern of random light dark bars  
 760 moving statically at constant speed in the  $\beta x$  direction.

761

### 762 HRC output for correlated noise stimuli

763 Here we calculate the HRC output for correlated noise stimuli. Assume that the antennae are held  
 764 at approximately the spacing of the correlation shift  $\Delta x$  (see last section), and that the correlation  
 765 direction is  $+x$  (rightward over the fly body), so  $\beta = 1$  from the last section. Then one arm of the  
 766 HRC gives:

767

$$769 \quad s_{LR}(t) = s_R(t) \frac{1}{\tau} \int_{-\infty}^t e^{-\frac{t-t'}{\tau}} s_L(t') dt'$$

768

770 Averaging over time gives:

771 
$$\langle s_{LR}(t) \rangle = \langle c(x, t) \frac{1}{\tau} \int_{-\infty}^t e^{-\frac{t-t'}{\tau}} c(x - \Delta x, t') dt' \rangle$$

772 Since  $\beta = 1$ , then only the last term in the correlation equation applies:

773 
$$\langle s_{LR}(t) \rangle = \langle c(x, t) \frac{1}{\tau} \int_{-\infty}^0 e^{-\frac{-t''}{\tau}} c(x - \Delta x, t + t'') dt'' \rangle$$

774 
$$\langle s_{LR}(t) \rangle = \frac{1}{\tau} \int_{-\infty}^0 e^{-\frac{-t''}{\tau}} \alpha \frac{1}{3} \delta_{t'', -\Delta t} dt''$$

775 
$$\langle s_{LR}(t) \rangle = \alpha \frac{1}{3\tau} e^{-|\Delta t|/\tau}, \Delta t > 0$$

776 This equation holds for  $\Delta t$  being positive. The other arm is analogous, for  $\Delta t < 0$ .

777 
$$s_{RL}(t) = s_L(t) \frac{1}{\tau} \int_{-\infty}^t e^{-\frac{t-t'}{\tau}} s_R(t') dt'$$

778 
$$\langle s_{RL}(t) \rangle = \langle c(x, t) \frac{1}{\tau} \int_{-\infty}^t e^{-\frac{t-t'}{\tau}} c(x + \Delta x, t') dt' \rangle$$

779 
$$\langle s_{RL}(t) \rangle = \langle c(x, t) \frac{1}{\tau} \int_{-\infty}^0 e^{-\frac{-t''}{\tau}} c(x + \Delta x, t + t'') dt'' \rangle$$

780 
$$\langle s_{RL}(t) \rangle = \frac{1}{\tau} \int_{-\infty}^0 e^{-\frac{-t''}{\tau}} \alpha \frac{1}{3} \delta_{t'', \Delta t} dt''$$

781 
$$\langle s_{RL}(t) \rangle = \alpha \frac{1}{3\tau} e^{-|\Delta t|/\tau}, \Delta t < 0$$

782 Thus, the full correlator output is

783 
$$\int_t r(t) dt = \langle s_{LR}(t) \rangle - \langle s_{RL}(t) \rangle = \alpha \cdot \text{sgn}(\Delta t) \frac{1}{3\tau} e^{-\frac{|\Delta t|}{\tau}}$$

784

785 Note that the correlator output response switches sign if the correlation polarity  $\alpha$  flips – this is the  
 786 reverse phi response. There is a slight artificiality in this expression, in that the response is  
 787 discontinuous at  $\Delta t = 0$ . We have assumed an exponential filter, which technically has an  
 788 immediate response time, violating causality. In addition, the optimal response occurs for an inter-  
 789 frame interval  $\Delta t$  that is arbitrarily small. As a more realistic filter, one can use  $\frac{t}{\tau^2} e^{-t/\tau}$ , which has  
 790 zero response at time zero and maximal response at  $t = \tau$ . Then:

791 
$$\int_t r(t) dt = \langle s_{LR}(t) \rangle - \langle s_{RL}(t) \rangle = \alpha \cdot \text{sgn}(\Delta t) \frac{1}{3\tau^2} \Delta t e^{-|\Delta t|/\tau}$$

792 This filter is continuous at  $\Delta t = 0$ , and the maximum correlator output occurs when the filter  
 793 timescale  $\tau$  matches the interframe interval  $\Delta t$ . In either case, the salient point is that the response  
 794 is antisymmetric in both the temporal shift  $\Delta t$  and the correlation polarity  $\alpha$ , as expected.



795

## 796 Analysis of imaged plume

797 We re-analyzed behavioral data previously extracted from *Drosophila* navigating an imaged  
798 complex plume of smoke (Demir et al., 2020) in the same walking assay used throughout this  
799 study. The signal in the virtual antenna was quantified as described previously; briefly, the virtual  
800 antenna is defined as an ellipse perpendicular to the body axis with the long axis given by the  
801 size of the fly ( $1.72 \pm 0.24$  mm) and the small axis equal to one-fifth the minor axis of the fly ( $0.46 \pm$   
802  $0.24$  mm). We re-analyzed the imaged fly and signal data to resolve the virtual antenna signal into  
803 14 pixels along its long axis (averaged along its short axis). Thus, the signal is a vector  $\mathbf{s}_{\text{ant}}(t) =$   
804  $[s(x_1, t), s(x_2, t), \dots, s(x_{14}, t)]$  defined at locations along the antenna's long axis  $\mathbf{x}_{\text{ant}} = [x_1, \dots, x_{14}]$   
805 for a given time  $t$ .

806 The overall concentration in the antenna was calculated as the average signal over the center of  
807 the virtual antenna – at the locations  $[x_5, x_6, x_7, x_8]$ . The gradient  $\nabla c_{\text{ant}}$  in the virtual antenna at a  
808 given  $t$  was calculated by regressing  $\mathbf{s}_{\text{ant}}$  against  $\mathbf{x}_{\text{ant}}$  and extracting the slope. The odor velocity  
809 in the virtual antenna was estimated by calculating correlations of the virtual antenna signal over  
810 space and time. For a given  $t$ , we calculated  $\widehat{\Delta x} = \operatorname{argmax}_{\Delta x} \langle s(x_i, t) s(x_i + \Delta x, t + \Delta t) \rangle_{x_i}$ , where  
811  $\Delta x$  spanned integers from -7 to 7, and  $\Delta t$  is the interframe interval (11 ms), and  $s(\cdot)$  were mean  
812 subtracted. This gives the signed number of pixels for which the correlation between two  
813 successive frames is maximized, up to the length of the antenna. The odor velocity was then  
814 defined as  $\widehat{\Delta x} \cdot \text{frame rate} \cdot \text{resolution}$ , where the frame rate is 90 frames per second and the  
815 spatial resolution is 0.153 mm per pixel. We disregarded points for which  $\widehat{\Delta x}$  was  $\pm 7$ , since those  
816 may not represent local maxima but were instead limited by the size of the antenna. All three  
817 quantities – total concentration, gradient, and odor velocity – were smoothed in time using a  
818 Savitsky-Golay filter of order 2 and smoothing window of 25 timepoints  $\sim 270$   $\mu\text{s}$ .

819 To remove boundary effects from the arena extent, we only used for Fig. 1c-e points for which  
820 the fly was in the central region of the arena,  $100 < x < 250$  mm,  $|y - y_0| < 40$  mm, where  $y_0$  is  
821 the plume's central axis, and only points for which fly speed was greater than 0.1 mm/s. Angular  
822 velocity was calculated as the average orientation change over 200 ms.

823

## 824 Analysis of simulated plume

825 The simulation generated concentration fields  $c(x_i, y_i, t)$  and flow velocity fields  $\mathbf{v}_{\text{wind}}(x_i, y_i, t)$   
826 defined on grid points  $(x_i, y_i)$  of a non-uniform mesh. We first generated values on a 0.5 mm  
827 square lattice, by triangulating the data and performing barycentric linear interpolation over each  
828 triangle (*scipy.interpolate.griddata* in Python, with method '*linear*'). Fields in Fig. 5 and  
829 Supplementary Fig. 8 were plotted every 1 cm, (i.e. every 20 pixels on the original 0.5 mm lattice).  
830 Wind speed vectors at each point on this 1 cm lattice were generated by averaging  $\mathbf{v}_{\text{wind}}$  over the  
831  $20 \times 20$  values in a  $1 \text{ cm}^2$  box. The plotted  $\mathbf{v}_{\text{wind|odor}}$  field was generated by only considering wind  
832 vectors for which the odor concentration was above  $1e-3$ . Odor gradients were generated by  
833 calculating local differences  $\nabla c_x$  and  $\nabla c_y$  in the  $x$ - and  $y$ - directions, respectively. Specifically, for  
834  $\nabla c_x$ , we calculated  $(x_+ - x_-)/(x_+ + x_-)$ , where  $x_+$  and  $x_-$  were the averages in the right and left  
835 half of a  $1 \text{ cm}^2$  box centered at each lattice point, respectively.  $\nabla c_y$  was calculated analogously,  
836 using the top and bottom half of the same box. Odor velocities were calculated similarly to those

837 in the imaged plume used in Fig. 1, by correlating the values in a given spatial region between  
838 two frames. Specifically, to get  $\mathbf{v}_{x, \text{odor}}$  at a given time  $t$ , we calculated  $\text{argmax}_{\Delta x} (s(x_j, t)s(x_j +$   
839  $\Delta x, t + \Delta t))_{x_j}$ , where  $s(x_j, t)$  was the odor concentration in a 1 cm<sup>2</sup> box averaged over the  $y$ -  
840 direction for each  $x_j$  pixel spaced by 0.5 mm. The shifts  $\Delta x$  ran from -20 to 20 pixels ( $\pm 1$  cm). This  
841 quantity was multiplied by the frame rate 100 frames per second and by the spatial resolution 0.5  
842 mm per pixel to get  $\mathbf{v}_{x, \text{odor}}$  in mm/s. An analogous operation was done for  $\mathbf{v}_{y, \text{odor}}$  using the same  
843 1 cm<sup>2</sup> box. All odor gradient and odor velocity values for very low odor concentrations were set to  
844 Nan, as were any odor velocity values that produced a maximum shift  $|\Delta x| = 20$ . The resulting  
845 wind speed, gradient, and odor velocity were all smoothed in time using a Savitsky-Golay filter of  
846 order 1 and window length 11 (110 ms).

#### 847 In silico virtual agent model and simulation

848 Virtual agents with 2 spatially separated sensors navigated the simulated plume described above  
849 using a simple algorithm. All agents were initialized at the back of the arena, facing upwind. At  
850 each frame (10 ms), agents turned either left or right 90° (except in one case where they  
851 maintained their heading; see below), depending on the navigation strategy as described in the  
852 main text, and stepped forward 0.75 mm. The sensors were placed 0.5 mm to the left or right of  
853 the agent centroid. The measured odor signal concentration was defined as  $c = \frac{(c_L + c_R)}{2}$ , where  
854 the concentration in each sensor was  $c_L$  and  $c_R$ , respectively. We set the detection threshold at  
855  $c_0 = 1\text{e-}3$ . The odor correlation between the two sensors was defined as  $c_{\text{odor}}(t) =$   
856  $c_L(t)c_R(t + \Delta T) - c_L(t + \Delta T)c_R(t)$ , where the delay timescale  $\Delta T$  was chosen as 1 frame. From  
857  $c_{\text{odor}}$ , the odor direction  $v_{\text{odor}}$  was defined +1 if  $\text{abs}(c_{\text{odor}}(t)) > 1\text{e-}8$  and  $\text{sgn}(c_{\text{odor}}(t)) > 0$ , as -1  
858 if  $\text{abs}(c_{\text{odor}}(t)) > 1\text{e-}8$  and  $\text{sgn}(c_{\text{odor}}(t)) < 0$ , and as 0 otherwise. In general, odor signals with a  
859 leftward component over the virtual agent in its body frame had  $v_{\text{odor}} = 1$  and, while those with a  
860 rightward component had  $v_{\text{odor}} = -1$ . Simulations were carried out separately for agents that  
861 could sense (DS+) and could not sense (DS-) odor direction. Agents followed the strategy as  
862 described in the main text. For DS+ flies, whenever  $c_{\text{odor}}$  was below threshold ( $\text{abs}(c_{\text{odor}}(t)) > 1\text{e-}$   
863  $8$ ), but the odor was still detectable ( $c > c_0$ ), the decisions obeyed the DS- strategy.

#### 864 Theoretical analysis of odor motion in turbulent odor plumes

865 Here we investigate the motion of odor signals perpendicular to the mean flow using a toy model  
866 of turbulent plume similar in spirit to those used in (Balkovsky and Shraiman, 2002; Goldstein,  
867 1951; Taylor, 1922). Odor packets are released from a point source at a given rate. The  
868 concentration around the center of each packet is given by a local diffusive process that spreads  
869 the concentration via molecular diffusion of the odor. Meanwhile, the packets themselves are  
870 advected downwind by the mean flow, while being dispersed by the fluctuating velocity  $u$  (Taylor,  
871 1922). We consider the simple case of an isolated packet and calculate its expected velocity  
872 crosswind to the flow, at different locations throughout the plume. For analytical simplicity, we  
873 model the turbulent velocity  $u$  as a telegraph process that switches between left motion and right  
874 motion at speed  $v$ , where the switching rates from left to right and vice versa are both  $\lambda = 1/T$ .  
875 Thus,  $2T$  is equivalent to the Lagrangian integral time scale and the packet speed  $v$  to the r.m.s.  
876 of the turbulent velocity field. While the velocity  $u$  switches discontinuously between  $+v$  and  $-v$ ,  
877 its time correlation function is the same as that of the Ornstein-Uhlenbeck (O-U) process often  
878 used to model homogeneous isotropic turbulence (Pope, 2011; Taylor, 1922):

879 
$$\langle u(t)u(t') \rangle \propto e^{-\frac{|t-t'|}{2T}}$$

880 Our goal is an estimate of the average odor motion velocity at a given lateral distance from the  
 881 plume, at a given time  $t$ ,  $\langle v \rangle_{y,t}$ . Since packets are advected downwind at some speed  $U \gg v$ , we  
 882 have  $t \approx x/U$ , so that this is equivalent to finding the average lateral velocity at some  $x, y$  position  
 883 in the plume (Pope, 2011). Run times are distributed as  $\frac{1}{T} e^{-t/T}$ , so packets reaching a given  $y$   
 884 will have been traveling for some distance  $\tilde{y}$ , where  $\tilde{y}$  is distributed as  $p(\tilde{y}) = \frac{1}{Tv} e^{-\tilde{y}/Tv}$ . If the  
 885 packets were originally uniformly distributed, then the average velocity at  $y$  would be 0. However,  
 886 an asymmetry arises due to the non-uniform packet distribution, which is dispersing laterally from  
 887 a delta function at  $y = 0$ . For times  $t \gg T$ , the distribution of packets is approximately the diffusion  
 888 kernel with effective turbulent diffusivity  $D_T = Tv^2/2$ :

889 
$$p(y, t) = \frac{1}{\sqrt{2\pi T v^2 t}} e^{-y^2/2Tv^2t}$$

890 Under these assumptions, the average velocity at the fixed point  $\langle v \rangle_{y,t}$  is:

891 
$$\langle v \rangle_{y,t} = \frac{v \int_{-\infty}^y p(y', t - y'/v) e^{-\frac{y-y'}{vT}} dy' - v \int_y^{\infty} p(y', t - y'/v) e^{-\frac{y'-y}{vT}} dy'}{\int_{-\infty}^{\infty} p(y', t - y'/v) e^{-\frac{|y-y'|}{vT}} dy'}$$

892 The first term in the numerator is for packets reaching  $y$  that have come from its left (these are  
 893 traveling in the  $+y$  direction), while the second is for those reaching  $y$  that have come from the  
 894 right, which are traveling in the  $-y$  direction. The denominator is a normalization factor given by  
 895 the total number of packets reaching  $y$  at time  $t$ . This equation can be integrated numerically. To  
 896 obtain an analytical approximation, we neglect the change in the packet distribution over the time  
 897 of traveling one correlation time, approximating  $p(y', t - y'/v)$  by  $p(y', t)$ , since the packet  
 898 distribution does not change appreciably over that time (the validity of this assumption was verified  
 899 by simulations). Integrating:

900 
$$\langle v \rangle_{y,t} = v \frac{(R_+ - R_-)}{(R_+ + R_-)}$$

901 where

902 
$$R_+ = e^{\frac{y}{Tv}} (1 - \text{Erf} \frac{vt + y}{\sqrt{2Tv^2t}})$$

903 
$$R_- = e^{-\frac{y}{Tv}} (1 - \text{Erf} \frac{vt - y}{\sqrt{2Tv^2t}})$$

904 for  $|y| < vt$ , and 0 otherwise. We are interested in i) whether the average lateral velocity of the  
 905 packets is directed outward from the plume, which would be indicated by an asymmetrical  
 906 dependence in  $y$ , and ii) how this asymmetry depends on the correlation time  $T$ . The profile of  
 907  $\langle v \rangle_{y,t}$  is odd for all  $T$  (Supplementary Fig. 9a), indicating that for any  $T$ , the velocity of odor packets  
 908 in the crosswind direction points away from the plume's central axis. Moreover, for higher  $T$ , the  
 909 velocity component points more strongly outward through a larger portion of the plume, indicating  
 910 that correlations in the packet motion underlie this directional cue (Supplementary Fig. 9a).

911 We next investigate how the combination of packet diffusion and packet centroid motion together  
 912 can influence a spacetime correlation of the odor concentration, as would be computed by time-  
 913 resolved bilateral measurements. We define a lateral correlator  $\langle \Delta y \Delta t | y_i \rangle$  at a position  $y$  and time  
 914  $t$ , assuming a packet is traveling nearby with trajectory  $y_i(t)$ . The correlator has the following  
 915 form:

$$916 \quad \langle \Delta y \Delta t | y_i \rangle = p_{++} p_{--} - p_{+-} p_{-+},$$

917 where

$$918 \quad p_{++} = p(y + \Delta y/2, t + \Delta t/2 | y_i(t))$$

$$919 \quad p_{--} = p(y - \Delta y/2, t - \Delta t/2 | y_i(t))$$

$$920 \quad p_{+-} = p(y + \Delta y/2, t - \Delta t/2 | y_i(t))$$

$$921 \quad p_{-+} = p(y - \Delta y/2, t + \Delta t/2 | y_i(t))$$

922 and where  $y_i(t)$  is the centroid of a nearby packet and  $p(\cdot)$  is the local concentration at a given  
 923 location and time around the packet. Thus, the correlator  $\langle \Delta y \Delta t \rangle$  is a time-antisymmetrized  
 924 quantity that compares the correlation of the odor concentration between two points in the  
 925 direction perpendicular to the mean wind, separated by  $\Delta y$  at times separated by  $\Delta t$ , given a  
 926 packet whose center is at  $(x_i, y_i)$  and which is released at  $t = 0$ . We stress that we do not imply  
 927 that this correlator is being enacted by any circuitry, nor is it a unique definition. However, it has  
 928 key features – namely comparisons across space and time, and time antisymmetry – which we  
 929 will show to be sufficient to detect the lateral odor velocity. Expanding this correlator gives

$$930 \quad \langle \Delta y \Delta t | y_i \rangle = \frac{\Delta y \Delta t}{4} (\partial_y p \partial_t p - p \partial_t \partial_y p)$$

931 to lowest order. For the packet model, at appreciable times  $t \gg T$ , this gives:

$$932 \quad \langle \Delta y \Delta t | y_i \rangle = \Delta y \Delta t \frac{-t \dot{y}_i + y - y_i}{32\pi D_p^2 t^3} e^{-(y-y_i)^2/2D_p t}$$

933 Note that this is for a single packet, and must be averaged over the packet distribution  $p(y_i, t)$  to  
 934 get the correlator at a fixed  $y, t$ :

$$935 \quad \langle \Delta y \Delta t \rangle = \int dy_i \langle \Delta y \Delta t | y_i \rangle p(y_i)$$

936 where  $p(y_i, t) = \frac{1}{\sqrt{2\pi T v^2 t}} e^{-y_i^2/2T v^2 t}$  for  $t \gg T$ , as above. We can approximate  $\dot{y}_i$  by  $\langle v \rangle_{y_i, t}$  – the  
 937 average velocity for a packet at position  $y_i$  as derived above. The expression for  $\langle \Delta y \Delta t \rangle$  does not  
 938 lend itself to a closed-form expression due to the complexity of  $\langle v \rangle_{y_i, t}$ ; we integrate it numerically.  
 939 We find that for  $D_p \ll D_T = v^2 T/2$ ,  $\langle \Delta y \Delta t \rangle$  has a clear asymmetry about  $y = 0$  as expected, and  
 940 that the peaks are stronger with increasing correlation time  $T$  (Supplementary Fig. 9b). Moreover,  
 941  $\langle \Delta y \Delta t \rangle$  increases on average with  $v$ , while decreasing with  $D_p$  (Supplementary Fig. 9c), indicating  
 942 that the response essentially derives from correlated motion over the detector rather than  
 943 molecular diffusion alone.

944

945

946 Statistical quantification

947 All error bars, when shown, represent standard error of the mean. Statistical tests used and  
948 significance levels ( $p$  value) for given comparisons are indicated in the main text. Throughout, \*,  
949 \*\*, \*\*\*, and \*\*\*\* refer to  $p$ -values of  $< 5e-2$ ,  $<1e-2$ ,  $<1e-3$ , and  $<1e-4$ . In some instances, \*\*\*\* may  
950 refer to  $p < 1e-6$ , if indicated in the text.

951

952 **REFERENCES**

- 953 Ackels, T., Erskine, A., Dasgupta, D., Marin, A.C., Warner, T.P.A., Tootoonian, S., Fukunaga, I.,  
954 Harris, J.J., and Schaefer, A.T. (2021). Fast odour dynamics are encoded in the olfactory system  
955 and guide behaviour. *Nature* *593*, 558-563.
- 956 Alvarez-Salvado, E., Licata, A.M., Connor, E.G., McHugh, M.K., King, B.M., Stavropoulos, N.,  
957 Victor, J.D., Crimaldi, J.P., and Nagel, K.I. (2018). Elementary sensory-motor transformations  
958 underlying olfactory navigation in walking fruit-flies. *Elife* *7*, e37815.
- 959 Anstis, S.M., and Rogers, B.J. (1975). Illusory reversal of visual depth and movement during  
960 changes of contrast. *Vision Res* *15*, 957-961.
- 961 Badwan, B.A., Creamer, M.S., Zavatone-Veth, J.A., and Clark, D.A. (2019). Dynamic  
962 nonlinearities enable direction opponency in *Drosophila* elementary motion detectors. *Nat*  
963 *Neurosci* *22*, 1318-1326.
- 964 Baker, K.L., Dickinson, M., Findley, T.M., Gire, D.H., Louis, M., Suver, M.P., Verhagen, J.V.,  
965 Nagel, K.I., and Smear, M.C. (2018). Algorithms for Olfactory Search across Species. *J Neurosci*  
966 *38*, 9383-9389.
- 967 Balkovsky, E., and Shraiman, B.I. (2002). Olfactory search at high Reynolds number. *Proceedings*  
968 *of the national academy of sciences* *99*, 12589-12593.
- 969 Bell, J.S., and Wilson, R.I. (2016). Behavior Reveals Selective Summation and Max Pooling  
970 among Olfactory Processing Channels. *Neuron* *91*, 425-438.
- 971 Boie, S.D., Connor, E.G., McHugh, M., Nagel, K.I., Ermentrout, G.B., Crimaldi, J.P., and Victor,  
972 J.D. (2018). Information-theoretic analysis of realistic odor plumes: What cues are useful for  
973 determining location? *PLoS computational biology* *14*, e1006275.
- 974 Borst, A., and Helmstaedter, M. (2015). Common circuit design in fly and mammalian motion  
975 vision. *Nature Neuroscience* *18*, 1067-1076.
- 976 Budick, S.A., and Dickinson, M.H. (2006). Free-flight responses of *Drosophila melanogaster* to  
977 attractive odors. *J Exp Biol* *209*, 3001-3017.
- 978 Budick, S.A., Reiser, M.B., and Dickinson, M.H. (2007). The role of visual and mechanosensory  
979 cues in structuring forward flight in *Drosophila melanogaster*. *J Exp Biol* *210*, 4092-4103.
- 980 Catania, K.C. (2013). Stereo and serial sniffing guide navigation to an odour source in a mammal.  
981 *Nat Commun* *4*, 1441.
- 982 Celani, A., Villermaux, E., and Vergassola, M. (2014). Odor landscapes in turbulent environments.  
983 *Physical Review X* *4*, 041015.
- 984 Chen, J., Mandel, H.B., Fitzgerald, J.E., and Clark, D.A. (2019). Asymmetric ON-OFF processing  
985 of visual motion cancels variability induced by the structure of natural scenes. *Elife* *8*, e47579.
- 986 Clark, D.A., Bursztyn, L., Horowitz, M.A., Schnitzer, M.J., and Clandinin, T.R. (2011). Defining the  
987 computational structure of the motion detector in *Drosophila*. *Neuron* *70*, 1165-1177.

- 988 Clark, D.A., and Demb, J.B. (2016). Parallel Computations in Insect and Mammalian Visual  
989 Motion Processing. *Curr Biol* 26, R1062-R1072.
- 990 Clark, D.A., Fitzgerald, J.E., Ales, J.M., Gohl, D.M., Silies, M.A., Norcia, A.M., and Clandinin, T.R.  
991 (2014). Flies and humans share a motion estimation strategy that exploits natural scene statistics.  
992 *Nat Neurosci* 17, 296-303.
- 993 Connor, E.G., McHugh, M.K., and Crimaldi, J.P. (2018). Quantification of airborne odor plumes  
994 using planar laser-induced fluorescence. *Experiments in Fluids* 59.
- 995 DeAngelis, B.D., Zavatone-Veth, J.A., Gonzalez-Suarez, A.D., and Clark, D.A. (2020).  
996 Spatiotemporally precise optogenetic activation of sensory neurons in freely walking *Drosophila*.  
997 *Elife* 9, e54183.
- 998 Demir, M., Kadakia, N., Anderson, H.D., Clark, D.A., and Emonet, T. (2020). Walking *Drosophila*  
999 navigate complex plumes using stochastic decisions biased by the timing of odor encounters.  
1000 *Elife* 9, e57524.
- 1001 Dolan, M.J., Frechter, S., Bates, A.S., Dan, C., Huoviala, P., Roberts, R.J., Schlegel, P., Dhawan,  
1002 S., Tabano, R., Dionne, H., *et al.* (2019). Neurogenetic dissection of the *Drosophila* lateral horn  
1003 reveals major outputs, diverse behavioural functions, and interactions with the mushroom body.  
1004 *Elife* 8, e43079.
- 1005 Duistermars, B.J., Chow, D.M., and Frye, M.A. (2009). Flies require bilateral sensory input to track  
1006 odor gradients in flight. *Curr Biol* 19, 1301-1307.
- 1007 Eichner, H., Joesch, M., Schnell, B., Reiff, D.F., and Borst, A. (2011). Internal structure of the fly  
1008 elementary motion detector. *Neuron* 70, 1155-1164.
- 1009 Euler, T., Detwiler, P.B., and Denk, W. (2002). Directionally selective calcium signals in dendrites  
1010 of starburst amacrine cells. *Nature* 418, 845-852.
- 1011 Famiglietti, E.V., Jr. (1983). 'Starburst' amacrine cells and cholinergic neurons: mirror-symmetric  
1012 on and off amacrine cells of rabbit retina. *Brain Res* 261, 138-144.
- 1013 Fitzgerald, J.E., and Clark, D.A. (2015). Nonlinear circuits for naturalistic visual motion estimation.  
1014 *Elife* 4, e09123.
- 1015 Fitzgerald, J.E., Katsov, A.Y., Clandinin, T.R., and Schnitzer, M.J. (2011). Symmetries in stimulus  
1016 statistics shape the form of visual motion estimators. *Proc Natl Acad Sci U S A* 108, 12909-12914.
- 1017 Flügge, C. (1934). Geruchliche raumorientierung von *Drosophila melanogaster*. *Journal of*  
1018 *Comparative Physiology A: Neuroethology, Sensory, Neural, and Behavioral Physiology* 20, 463-  
1019 500.
- 1020 Gardiner, J.M., and Atema, J. (2010). The function of bilateral odor arrival time differences in  
1021 olfactory orientation of sharks. *Curr Biol* 20, 1187-1191.
- 1022 Gaudry, Q., Hong, E.J., Kain, J., de Bivort, B.L., and Wilson, R.I. (2013). Asymmetric  
1023 neurotransmitter release enables rapid odour lateralization in *Drosophila*. *Nature* 493, 424.

- 1024 Goldstein, S. (1951). On Diffusion by Discontinuous Movements, and on the Telegraph Equation.  
1025 *Q J Mech Appl Math* 4, 129-156.
- 1026 Gorur-Shandilya, S., Demir, M., Long, J., Clark, D.A., and Emonet, T. (2017). Olfactory receptor  
1027 neurons use gain control and complementary kinetics to encode intermittent odorant stimuli. *Elife*  
1028 6, e27670.
- 1029 Gruntman, E., Romani, S., and Reiser, M.B. (2018). Simple integration of fast excitation and  
1030 offset, delayed inhibition computes directional selectivity in *Drosophila*. *Nat Neurosci* 21, 250-257.
- 1031 Gruntman, E., Romani, S., and Reiser, M.B. (2019). The computation of directional selectivity in  
1032 the *Drosophila* OFF motion pathway. *Elife* 8, e50706.
- 1033 Gumaste, A., Coronas-Samano, G., Hengenius, J., Axman, R., Connor, E.G., Baker, K.L.,  
1034 Ermentrout, B., Crimaldi, J.P., and Verhagen, J.V. (2020). A Comparison between Mouse, In  
1035 Silico, and Robot Odor Plume Navigation Reveals Advantages of Mouse Odor Tracking. *eNeuro*  
1036 7.
- 1037 Haag, J., Arenz, A., Serbe, E., Gabbiani, F., and Borst, A. (2016). Complementary mechanisms  
1038 create direction selectivity in the fly. *Elife* 5, e17421.
- 1039 Haag, J., Denk, W., and Borst, A. (2004). Fly motion vision is based on Reichardt detectors  
1040 regardless of the signal-to-noise ratio. *Proc Natl Acad Sci U S A* 101, 16333-16338.
- 1041 Hassenstein, B., and Reichardt, W.Z. (1956). Systemtheoretische analyse der zeit-, reihenfolgen-  
1042 und vorzeichenbewertung bei der bewegungsperzeption des rüsselkäfers chlorophanus.  
1043 *Zeitschrift für Naturforschung* 11, 513-524.
- 1044 Hengenius, J.B., Connor, E.G., Crimaldi, J.P., Urban, N.N., and Ermentrout, G.B. (2021).  
1045 Olfactory navigation in the real world: Simple local search strategies for turbulent environments.  
1046 *J Theor Biol* 516, 110607.
- 1047 Hu, Q., and Victor, J.D. (2010). A set of high-order spatiotemporal stimuli that elicit motion and  
1048 reverse-phi percepts. *J Vision* 10.
- 1049 Jayaram, V., Kadakia, N., and Emonet, T. (2021). Navigating a diversity of turbulent plumes is  
1050 enhanced by sensing complementary features of odor signals. *bioRxiv*,  
1051 10.1101/2021.1107.1128.454116.
- 1052 Jefferis, G.S., Potter, C.J., Chan, A.M., Marin, E.C., Rohlfsing, T., Maurer, C.R., Jr., and Luo, L.  
1053 (2007). Comprehensive maps of *Drosophila* higher olfactory centers: spatially segregated fruit  
1054 and pheromone representation. *Cell* 128, 1187-1203.
- 1055 Jung, S.H., Hueston, C., and Bhandawat, V. (2015). Odor-identity dependent motor programs  
1056 underlie behavioral responses to odors. *Elife* 4, e11092.
- 1057 Kanzaki, R., Sugi, N., and Shibuya, T. (1992). Self-generated zigzag turning of *Bombyx mori*  
1058 males during pheromone-mediated upwind walking. *Zoological Science* 9, 515-527.
- 1059 Kennedy, J.S., and Marsh, D. (1974). Pheromone-regulated anemotaxis in flying moths. *Science*  
1060 184, 999-1001.



- 1061 Klapoetke, N.C., Murata, Y., Kim, S.S., Pulver, S.R., Birdsey-Benson, A., Cho, Y.K., Morimoto,  
1062 T.K., Chuong, A.S., Carpenter, E.J., Tian, Z., *et al.* (2014). Independent optical excitation of  
1063 distinct neural populations. *Nat Methods* *11*, 338-346.
- 1064 Kowadlo, G., and Russell, R.A. (2008). Robot odor localization: A taxonomy and survey. *The*  
1065 *International Journal of Robotics Research* *27*, 869-894.
- 1066 Liu, A., Papale, A.E., Hengenius, J., Patel, K., Ermentrout, B., and Urban, N.N. (2020). Mouse  
1067 Navigation Strategies for Odor Source Localization. *Front Neurosci* *14*, 218.
- 1068 Livingstone, M.S., Pack, C.C., and Born, R.T. (2001). Two-dimensional substructure of MT  
1069 receptive fields. *Neuron* *30*, 781-793.
- 1070 Mafra-Neto, A., and Cardé, R.T. (1994). Fine-scale structure of pheromone plumes modulates  
1071 upwind orientation of flying moths. *Nature* *369*, 142-144.
- 1072 Maisak, M.S., Haag, J., Ammer, G., Serbe, E., Meier, M., Leonhardt, A., Schilling, T., Bahl, A.,  
1073 Rubin, G.M., Nern, A., *et al.* (2013). A directional tuning map of *Drosophila* elementary motion  
1074 detectors. *Nature* *500*, 212-216.
- 1075 Martelli, C., Carlson, J.R., and Emonet, T. (2013). Intensity invariant dynamics and odor-specific  
1076 latencies in olfactory receptor neuron response. *J Neurosci* *33*, 6285-6297.
- 1077 Miller, C.J., and Carlson, J.R. (2010). Regulation of odor receptor genes in trichoid sensilla of the  
1078 *Drosophila* antenna. *Genetics* *186*, 79-95.
- 1079 Mohamed, A.A.M., Hansson, B.S., and Sachse, S. (2019). Third-Order Neurons in the Lateral  
1080 Horn Enhance Bilateral Contrast of Odor Inputs Through Contralateral Inhibition in *Drosophila*.  
1081 *Front Physiol* *10*, 851.
- 1082 Murlis, J., Elkinton, J.S., and Carde, R.T. (1992). Odor plumes and how insects use them. *Annual*  
1083 *review of entomology* *37*, 505-532.
- 1084 Murlis, J., Willis, M.A., and Cardé, R.T. (2000). Spatial and temporal structures of pheromone  
1085 plumes in fields and forests. *Physiol Entomol* *25*, 211-222.
- 1086 Orger, M.B., Smear, M.C., Anstis, S.M., and Baier, H. (2000). Perception of Fourier and non-  
1087 Fourier motion by larval zebrafish. *Nat Neurosci* *3*, 1128-1133.
- 1088 Pang, R., van Breugel, F., Dickinson, M., Riffell, J.A., and Fairhall, A. (2018). History dependence  
1089 in insect flight decisions during odor tracking. *PLoS Comput Biol* *14*, e1005969.
- 1090 Park, I.J., Hein, A.M., Bobkov, Y.V., Reidenbach, M.A., Ache, B.W., and Principe, J.C. (2016).  
1091 Neurally encoding time for olfactory navigation. *PLoS computational biology* *12*, e1004682.
- 1092 Pope, S.B. (2011). Simple models of turbulent flows. *Phys Fluids* *23*, 011301.
- 1093 Rajan, R., Clement, J.P., and Bhalla, U.S. (2006). Rats smell in stereo. *Science* *311*, 666-670.
- 1094 Riffell, J.A., Abrell, L., and Hildebrand, J.G. (2008). Physical processes and real-time chemical  
1095 measurement of the insect olfactory environment. *Journal of Chemical Ecology* *34*, 837-853.

- 1096 Rigolli, N., Magnoli, N., Rosasco, L., and Seminara, A. (2021). Learning to predict target location  
1097 with turbulent odor plumes. *arXiv*, 2106.08988.
- 1098 Riman, N., Victor, J.D., Boie, S.D., and Ermentrout, B. (2021). The Dynamics of Bilateral Olfactory  
1099 Search and Navigation. *Siam Rev* 63, 100-120.
- 1100 Salazar-Gatzimas, E., Agrochao, M., Fitzgerald, J.E., and Clark, D.A. (2018). The Neuronal Basis  
1101 of an Illusory Motion Percept Is Explained by Decorrelation of Parallel Motion Pathways. *Curr Biol*  
1102 28, 3748-3762 e3748.
- 1103 Salazar-Gatzimas, E., Chen, J., Creamer, M.S., Mano, O., Mandel, H.B., Matulis, C.A., Pottackal,  
1104 J., and Clark, D.A. (2016). Direct Measurement of Correlation Responses in *Drosophila*  
1105 Elementary Motion Detectors Reveals Fast Timescale Tuning. *Neuron* 92, 227-239.
- 1106 Semmelhack, J.L., and Wang, J.W. (2009). Select *Drosophila* glomeruli mediate innate olfactory  
1107 attraction and aversion. *Nature* 459, 218-223.
- 1108 Shinomiya, K., Huang, G., Lu, Z., Parag, T., Xu, C.S., Aniceto, R., Ansari, N., Cheatham, N.,  
1109 Lauchie, S., Neace, E., *et al.* (2019). Comparisons between the ON- and OFF-edge motion  
1110 pathways in the *Drosophila* brain. *Elife* 8, e40025.
- 1111 Shusterman, R., Smear, M.C., Koulakov, A.A., and Rinberg, D. (2011). Precise olfactory  
1112 responses tile the sniff cycle. *Nat Neurosci* 14, 1039-1044.
- 1113 Sreenivasan, K.R. (2019). Turbulent mixing: A perspective. *Proc Natl Acad Sci U S A* 116, 18175-  
1114 18183.
- 1115 Strother, J.A., Wu, S.T., Wong, A.M., Nern, A., Rogers, E.M., Le, J.Q., Rubin, G.M., and Reiser,  
1116 M.B. (2017). The Emergence of Directional Selectivity in the Visual Motion Pathway of *Drosophila*.  
1117 *Neuron* 94, 168-182 e110.
- 1118 Suver, M.P., Matheson, A.M.M., Sarkar, S., Damiata, M., Schoppik, D., and Nagel, K.I. (2019).  
1119 Encoding of Wind Direction by Central Neurons in *Drosophila*. *Neuron* 102, 828-842 e827.
- 1120 Takemura, S.Y., Nern, A., Chklovskii, D.B., Scheffer, L.K., Rubin, G.M., and Meinertzhagen, I.A.  
1121 (2017). The comprehensive connectome of a neural substrate for 'ON' motion detection in  
1122 *Drosophila*. *Elife* 6.
- 1123 Tao, L., Ozarkar, S., and Bhandawat, V. (2020). Mechanisms underlying attraction to odors in  
1124 walking *Drosophila*. *PLoS computational biology* 16, e1007718.
- 1125 Taylor, G.I. (1922). Diffusion by continuous movements. *P Lond Math Soc* 20, 196-212.
- 1126 Tobin, W.F., Wilson, R.I., and Lee, W.C.A. (2017). Wiring variations that enable and constrain  
1127 neural computation in a sensory microcircuit. *Elife* 6, e24838.
- 1128 Tuthill, J.C., Chiappe, M.E., and Reiser, M.B. (2011). Neural correlates of illusory motion  
1129 perception in *Drosophila*. *Proc Natl Acad Sci U S A* 108, 9685-9690.
- 1130 van Breugel, F., and Dickinson, M.H. (2014). Plume-tracking behavior of flying *Drosophila*  
1131 emerges from a set of distinct sensory-motor reflexes. *Current Biology* 24, 274-286.

1132 Vickers, N.J., and Baker, T.C. (1994). Reiterative responses to single strands of odor promote  
1133 sustained upwind flight and odor source location by moths. *Proceedings of the National Academy*  
1134 *of Sciences* *91*, 5756-5760.

1135 Wienecke, C.F.R., Leong, J.C.S., and Clandinin, T.R. (2018). Linear Summation Underlies  
1136 Direction Selectivity in *Drosophila*. *Neuron* *99*, 680-688 e684.

1137 Wu, Y., Chen, K., Ye, Y., Zhang, T., and Zhou, W. (2020). Humans navigate with stereo olfaction.  
1138 *Proc Natl Acad Sci U S A* *117*, 16065-16071.

1139

1140

1141 **SUPPLEMENTARY FIGURES**

1142

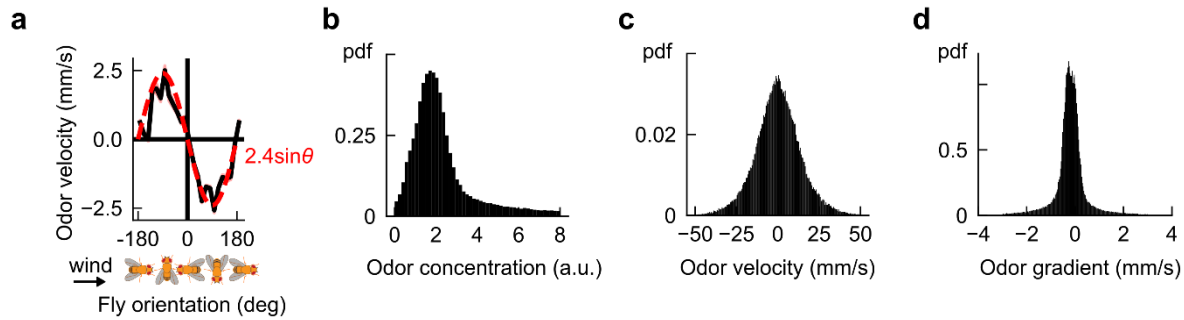

1143

1144

1145 **Supplementary Figure 1. Verification of odor velocity calculation and distributions of signal-derived**  
1146 **quantities in measured plume. a**, Odor velocity measured in the virtual antenna at all times for navigating  
1147 flies in measured smoke plume, plotted as a function of fly orientation. The  $\sin(\theta)$  trend reflects the fact that  
1148 the main component of odor velocity is parallel to the mean wind direction  $0^\circ$ , as expected – a consistency  
1149 check on the odor velocity calculation. **b**, Histograms of signal-derived quantities measured in the fly virtual  
1150 antenna; the x-axis limits in Fig. 1c-e are determined by the extent of these histograms.

1151

1152

1153

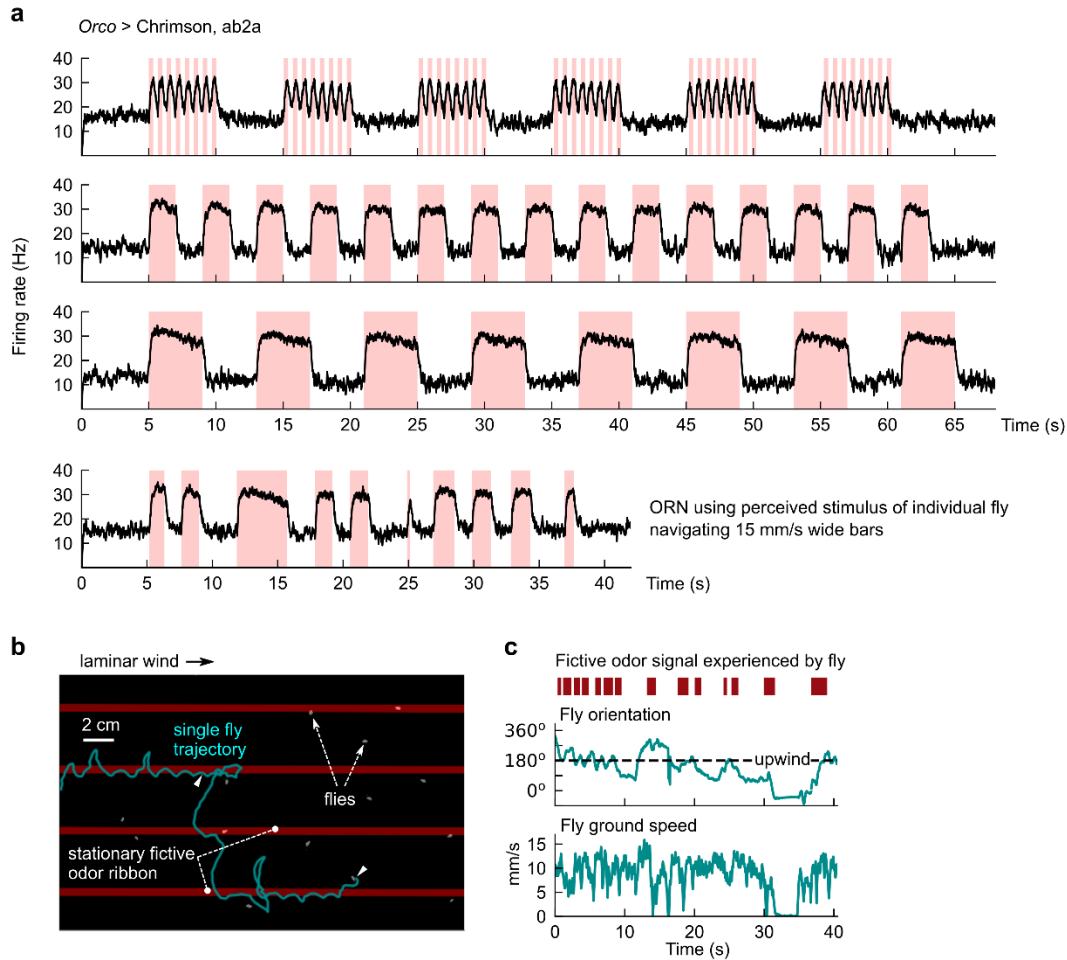

1154

1155 **Supplementary Figure 2. Electrophysiological and behavioral verification of optogenetic activation**  
 1156 **of *Drosophila* ORNs.** **a**, Extracellular measurements of ab2A firing rates for various odor signals mimicking  
 1157 those we use throughout our study. Stimuli (red shades) are delivered using a Luxeon Rebel 627 nm red  
 1158 LED (Lumileds Holding B.V., Amsterdam, Netherlands) at 10 uW/mm<sup>2</sup>. The frequency and duty cycle for  
 1159 the stimuli in the first plot are 1.5 Hz and 50% respectively, which mimics what a stationary fly in the 5 cm  
 1160 wide, 15 mm/s fast moving bars (Fig. 2b) would perceive. Longer stimuli approximate the experienced  
 1161 stimuli in the wide moving bars (Fig. 2e-f). Last plot shows the perceived stimulus and corresponding firing  
 1162 rate for one representative measured fly navigating 15 mm/s moving wide bars. **b**, Illustrative track of fly  
 1163 following stationary fictive odor ribbons upwind. Red bars: optogenetic stimulus location – bars are overlaid  
 1164 on the figure, but not actually imaged since the image is IR-pass filtered. **c**, Perceived fictive odor signal for  
 1165 fly (red bars) can be simultaneously quantified with fly behavior (teal) by aligning camera and projector  
 1166 coordinate systems (Methods). Plotted are the perceived fictive odor signal and behaviors for the track  
 1167 shown in **b**.

1168

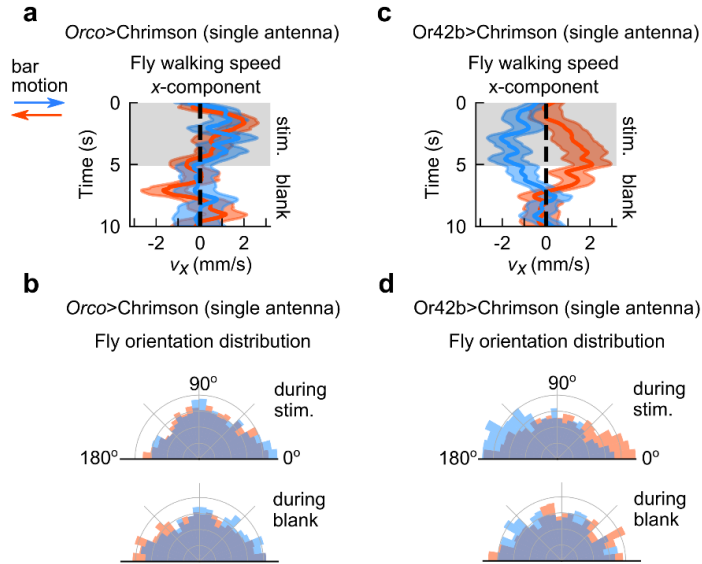

1169

1170 **Supplementary Figure 3. Olfactory direction selectivity is abolished in single antenna flies and**  
1171 **preserved in flies expressing Chrimson in a single Or.** **a**, Component of fly walking velocity along +x  
1172 direction during the 5s stimulus (shaded grey) and blank periods (illustrated in Fig. 2b), in *Orco>Chrimson*  
1173 flies who have one antenna ablated (compare to Fig. 2d). Blue and orange denote rightward and leftward  
1174 moving bars, respectively. Since it is difficult to distinguish flies walking on the top and bottom surface of  
1175 the assay, right- and left-antenna ablated flies are pooled.  $n = 307, 304$  tracks for rightward and leftward  
1176 bar motion, respectively. **b**, Distribution of fly orientations during the 5s stimulus (top) and 5s blank periods  
1177 (bottom), for rightward (blue) and leftward (orange) bar motion, *Orco>Chrimson* flies with one antenna  
1178 ablated (compare Fig. 2d). Orientations are symmetrized over the x-axis. **c-d**, Same as **a-b**, for  
1179 *Or42b>Chrimson* flies (not antenna ablated).  $n = 80, 96$  tracks for rightward and leftward bar motion,  
1180 respectively.  
1181

1182

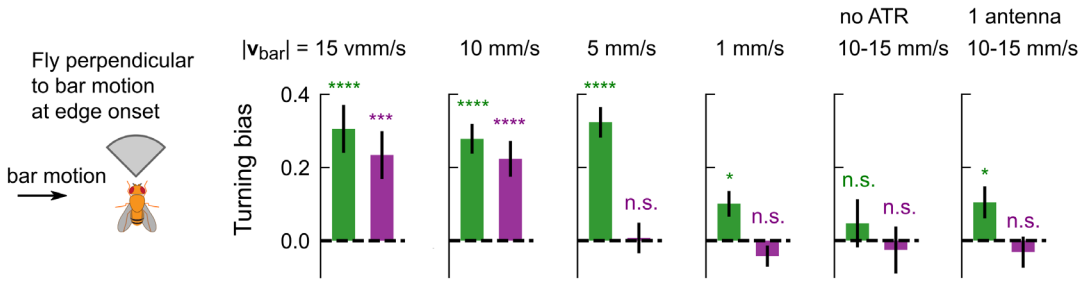

1183

1184

1185

1186

1187

1188

1189

1190

1191

1192

1193

1194

1195

1196

1197

1198

1199

**Supplementary Figure 4. Turning responses at ON and OFF edges for moving bars at various speeds and negative controls are consistent with direction selectivity.** Turning bias for all times that flies cross the fictive odor ON (green) or OFF (purple) edge, for flies oriented within a  $90^\circ$  sector of the direction perpendicular to bar motion. Turning bias calculated as sign of fly orientation change from 150 ms to 300 ms after the edge hit. All flies are *Orco*>*Chrimson* and fed ATR (i.e. optogenetically active) except in the 5<sup>th</sup> plot, which are not fed ATR. Data are shown for bars that move at various speeds (left 4 plots), as well as for negative controls (5<sup>th</sup> and 6<sup>th</sup> plot). *P* values calculated using the chi-squared test (\*\*\*\**p* < 1e-4, \*\*\**p* < 1e-3, \*\**p* < 1e-2, \**p* < 0.05). *n* = 773, 1625, 1877, 1175, 3622, and 1487 tracks for the 6 plots, respectively). Direction selectivity is satisfied if both ON and OFF edge responses have the same sign; gradient sensing would require opposite signs for the two edges. Data indicate that flies counterturn against the direction of fictive odor bars at both edges, provided the bar speed is fast enough. Large ON responses for slow bar speeds are likely attributed to gradient sensing.

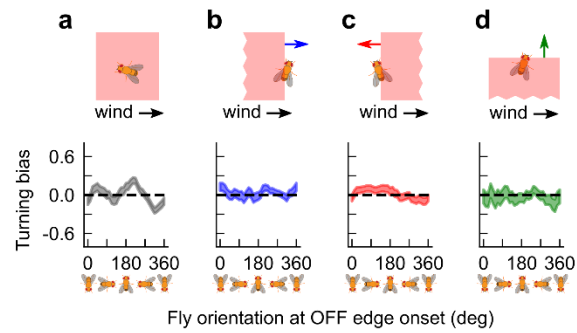

1200  
1201  
1202  
1203  
1204  
1205  
1206  
1207  
1208

**Supplementary Figure 5. Fly turning to OFF edges in the presence of laminar wind exhibits no directional bias.** **a**, Turning bias versus fly orientation when bilateral optogenetic stimulus is turned off (compare first plot in Fig. 3B for flash onset). **b-d**, Fly turning bias for 15 mm/s bars moving parallel, antiparallel, and perpendicular to 150 mm/s laminar wind (compare Fig. 3d).



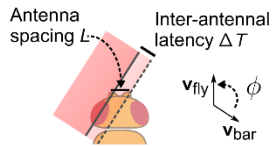

$$\Delta T = \frac{L \sin \phi}{|\mathbf{v}_{\text{bar}}| - |\mathbf{v}_{\text{fly}}| \cos \phi}$$

1209

1210

1211 **Supplementary Figure 6. Schematic illustrating calculation of latency  $\Delta T$  between antennae hits for**  
1212 **moving edges.** Correlation-based models for direction selectivity depend on the latency  $\Delta T$  of the time the  
1213 edge hits the two sensors – in this case, the fly's two antennae. Measuring  $\Delta T$  does not require resolving  
1214 the image or stimulus at antennal resolution ( $\sim 300 \mu\text{m}$ ), rather  $\Delta T$  can be inferred with knowledge of the  
1215 fly's orientation relative to the bar direction  $\phi$ , as well as the speeds of the fly and bar – all of which are  
1216 known. See Methods for details of the calculation and an estimate of the uncertainty.

1217

1218

1219

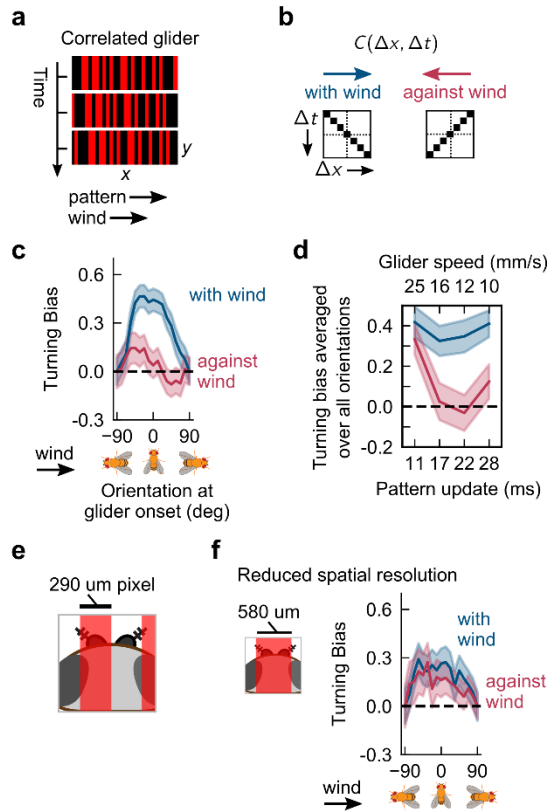

1220  
1221  
1222  
1223  
1224  
1225  
1226  
1227  
1228  
1229  
1230  
1231  
1232  
1233  
1234  
1235  
1236  
1237  
1238  
1239  
1240  
1241  
1242  
1243  
1244  
1245  
1246  
1247  
1248

**Supplementary Figure 7. Gliders provide further evidence that direction sensing is enacted using a correlation-based algorithm.** **a**, Snapshots of glider stimulus with correlations along  $+x$  axis, for 3 consecutive frames. In one instance of time, stimulus is a random pattern of light and dark 1-pixel-wide bars perpendicular to 150 mm/s laminar wind. Each  $x$ -pixel is perfectly correlated with the pixel to its right in the next frame; thus the pattern in the next frame is the same as the pattern in the current frame, but shifted by one pixel. Visually, this would be perceived as a fixed pattern moving coherently (“gliding”) to the right. **b**, Like correlated noise (Fig. 4 in main text), gliders are defined by their correlation matrix  $C(\Delta x, \Delta t)$ . Unlike correlated noise, the correlations i) are exact – i.e. magnitude 1, and ii) exist for many spacetime points. That is, for rightward correlated gliders, a given pixel in a given frame is perfectly correlated with the pixel to its right one frame later, but also with the second pixel to its right 2 frames later, etc. Thus  $C(\Delta x, \Delta t)$  has values  $+1$  along the diagonal. Similarly,  $C(\Delta x, \Delta t)$  has values  $1$  along the anti-diagonal. Since  $+x$  points downwind, we call gliders with correlations to the right “with-wind”, and gliders with correlations to the left “against-wind.” **c**, Turning bias versus fly orientation for with-wind (blue) and against-wind (red) gliders. Data using frame rates of 45 or 60 Hz are pooled. Gliders are presented in 4s blocks, interleaved with 4s of no stimulus. Turning bias is defined as the sign of the change in orientation from 200 to 500 ms after the block onset. We only used flies with speeds  $< 12$  mm/s for gliders, since long-range correlations can interfere with the intended correlation if fly walking speed is near the glider speed.  $n = 597, 661$  for with-wind and against-wind, respectively. **d**, Turning bias averaged over all orientations for different glider speeds. Glider speed is calculated as (pixel width)·(pattern update) where the pixel width is  $290 \mu\text{m}$  and the pattern rate is some multiple of the inverse frame rate,  $1/(180 \text{ Hz})$ .  $n = 537, 289, 275, 440$  tracks for with-wind stimuli at glider speeds 25, 16, 12, and 10 mm/s, respectively;  $n = 495, 308, 386, 383$  tracks for against-wind stimuli at same glider speeds, respectively. **e**, For correlated stimuli to be perceived in our assay, the bar width (size of  $x$ -pixel,  $290 \mu\text{m}$ ), must be on the order of the fly antennal separation ( $\sim 300 \mu\text{m}$ ). **f**, Glider stimuli experiments repeated for bars that were double the width,  $580 \mu\text{m}$ . Differences now disappear for with and against-wind correlations, consistent with bilaterally-enabled direction sensing, since these bars are too wide to stimulate antennae differentially.  $n = 741, 677$  for with-wind and against-wind, respectively.

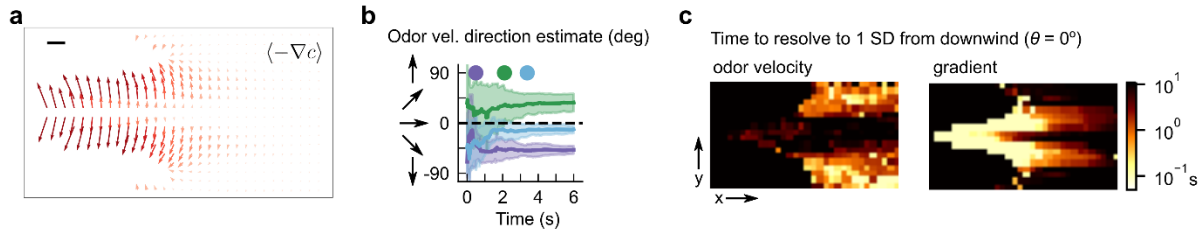

1249  
1250  
1251  
1252  
1253  
1254  
1255  
1256  
1257  
1258  
1259  
1260  
1261  
1262  
1263  
1264

**Supplementary Figure 8. Odor velocity and concentration gradients provide complementary directional information in complex plumes.** **a**, Vector field of the negative gradient of odor concentration  $-\nabla c$ , averaged over the full simulation (compare to Fig. 5c in the main text). Gradients contain strong lateral components near the odor source. **b**, Time course of an estimate of the direction of odor motion  $\theta_{\text{odor}} = \tan^{-1}(\mathbf{v}_{y,\text{odor}}, \mathbf{v}_{x,\text{odor}})$  at the center of the boxed regions in Fig. 5a, determined by averaging all detectable  $\theta$  in the past  $t$  seconds. Error bars are found by repeating this for 16 different 10 s time windows throughout the simulation, and taking the average and standard deviation over these 16 samples – these correspond to the mean and standard error of the mean. Dots indicate the time needed to distinguish the direction of odor motion from  $0^\circ$  (downwind) with a 68% confidence level for the 3 regions. **c**, Heatmap of time taken to distinguish the direction of odor motion from  $0^\circ$  to within 68% confidence for fixed locations throughout plume. Black values include the possibility that the odor motion direction is not distinguishable from downwind no matter how long one samples.

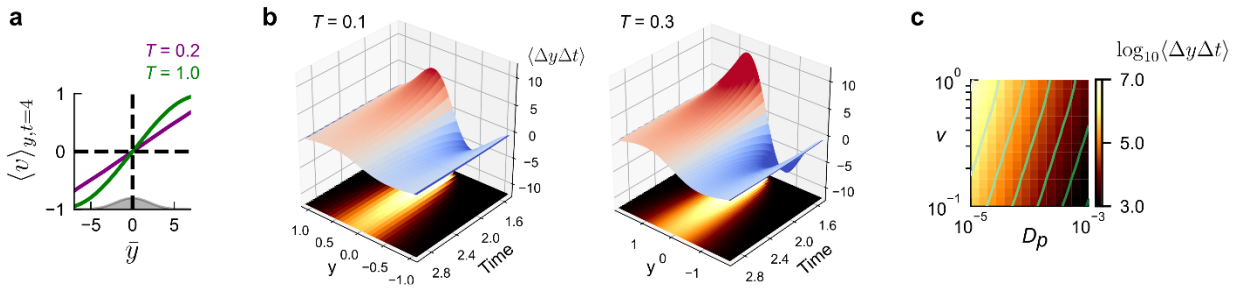

1265  
 1266  
 1267  
 1268  
 1269  
 1270  
 1271  
 1272  
 1273  
 1274  
 1275  
 1276  
 1277  
 1278  
 1279  
 1280  
 1281  
 1282  
 1283  
 1284

**Supplementary Figure 9. Odor velocity in model of turbulent plumes points outward from plume centerline and is computed by local space-time correlators.** A packet model of turbulent plumes. Packets are released from a source and disperse in the lateral direction while being advected downwind (see Methods for model and calculation details). **a**, Packet velocity  $\langle v \rangle_{y,t}$  in the plume model, as a function of  $\bar{y} = y/\sqrt{T}$ , for two correlation times,  $T = 0.2$  (purple) and  $T = 1$  (green), at a fixed time  $t = 4$ . Here,  $v$  is set to 1. To directly compare velocity for plumes with different  $T$ , (and therefore different diffusivities) we plot the velocity versus the normalized length  $\bar{y}$ . Specifically, since  $\langle y^2 \rangle = 2Tv^2t$  for  $t \gg T$  then at a given  $t$ , the packet distribution in terms of  $\bar{y}$  is the same for plumes with distinct  $T$ . The distribution of packets for either  $T$  is a function of  $\bar{y}$  is shown in grey. The velocity is an odd function of  $y$ , i.e. it points outward from the plume axis. In addition, the asymmetry is steeper for higher correlation times. **b**, The value of the correlator  $\langle \Delta y \Delta t \rangle$  as a function of lateral distance  $y$ , for various times  $t$  for  $T = 0.1$  (left) and  $T = 0.3$  (right). Here,  $D_p = 0.005$ . Since the packets are advected downwind with a velocity  $U \gg v$ , then the time axis is proportional to the downwind distance. The packet distribution is shown on the bottom; the limits of the  $y$ -axis are chosen such that the plume extents are the same in both plots. **c**, The total integral of the absolute value of  $\langle \Delta y \Delta t \rangle$  at a fixed  $t = 4$ , as a function of odor packet speed ( $y$ -axis) and molecular diffusivity ( $D_p$ ), with  $T = 1$ ,  $v = 1$ . The correlator is higher for greater packet speeds and lower molecular diffusivities (top left corner).
